# Supplementary material for: Ph2PI as a reduction/phosphination reagent: providing easy access to phosphine oxides
Source: Royal Society of Chemistry journal article supplement (doi:10.1039/c2cc33908k), 2012-01-01
Supplement: c2cc33908k.pdf [file c2cc33908k.pdf]

## Supporting Information

### **Ph<sub>2</sub>PI As A Reduction/Phosphination Reagent: Providing An Easy Access of Phosphine Oxides**

**Feijun Wang,<sup>\*a</sup> Mingliang Qu,<sup>a</sup> Feng Chen,<sup>a</sup> Qin Xu,<sup>\*a</sup> and Min Shi<sup>\*a,b</sup>**

<sup>†</sup>*Key Laboratory for Advanced Materials and Institute of Fine Chemicals, School of Chemistry & Molecular Engineering, East China University of Science and Technology, and 130 MeiLong Road, Shanghai 200237, PeOP:le's Republic of China, and <sup>‡</sup>State Key Laboratory of Organometallic Chemistry, Shanghai Institute of Organic Chemistry, Chinese Academy of Sciences, 354 Fenglin Road, Shanghai 200032, PeOP:le's Republic of China*

[feijunwang@ecust.edu.cn](mailto:feijunwang@ecust.edu.cn), [Mshi@mail.sioc.ac.cn](mailto:Mshi@mail.sioc.ac.cn)

#### **CONTENTS**

|                                                                             |     |
|-----------------------------------------------------------------------------|-----|
| General remarks.....                                                        | S2  |
| General procedure for the reaction of aldehyde with Ph <sub>2</sub> PI..... | S3  |
| Mass spectra for the reaction of benzaldehyde with Ph <sub>2</sub> PI.....  | S34 |
| Reference.....                                                              | S35 |

**General remarks.** Dichloromethane was freshly distilled from calcium hydride; CH<sub>3</sub>CN was distilled from calcium hydride (CaH<sub>2</sub>) under argon (Ar) atmosphere. Melting points were determined on a digital melting point apparatus and temperatures were uncorrected. <sup>1</sup>H NMR and <sup>13</sup>C NMR spectra were recorded on a Bruker AM-300 or AM-400 spectrometers. Flash column chromatography was performed using 300-400 mesh silica gel. For thin-layer chromatography (TLC), silica gel plates (Huanghai GF<sub>254</sub>) were used. Mass spectra were recorded by EI and ESI, and HRMS were measured on a HP-5989 instrument.

## General procedure for the reaction of aldehyde with Ph<sub>2</sub>PI

To a stirred mixture of Ph<sub>2</sub>PCl (4.5 mmol), NaI (4.5 mmol) and anhydrous CH<sub>3</sub>CN (5 mL) was added aldehyde **2** (1.0 mmol) at room temperature under argon atmosphere. The reaction mixture was stirred at 80 °C in oil bath for 24 h. When the reaction temperature down to room temperature, 30% H<sub>2</sub>O<sub>2</sub> aqueous (0.5 ml) was slowly added. After 10 minutes, sat. aqueous Na<sub>2</sub>S<sub>2</sub>O<sub>3</sub> was added to the reaction mixture. The organic layer was extracted with dichloromethane, washed with brine, dried over MgSO<sub>4</sub>, and concentrated under reduced pressure. The residue was purified by chromatography on silica gel to obtain the corresponding phosphine oxide.

### Benzyl diphenylphosphine oxide **3aa** <sup>[1]</sup>

White solid; <sup>1</sup>H NMR (400 MHz, CDCl<sub>3</sub>, TMS) δ 3.65 (d, *J* = 13.6 Hz, 2H), 7.09-7.12 (m, 2H), 7.16-7.18 (m, 3H), 7.41-7.44 (m, 4H), 7.47-7.51 (m, 2H), 7.67-7.71 (m, 4H).

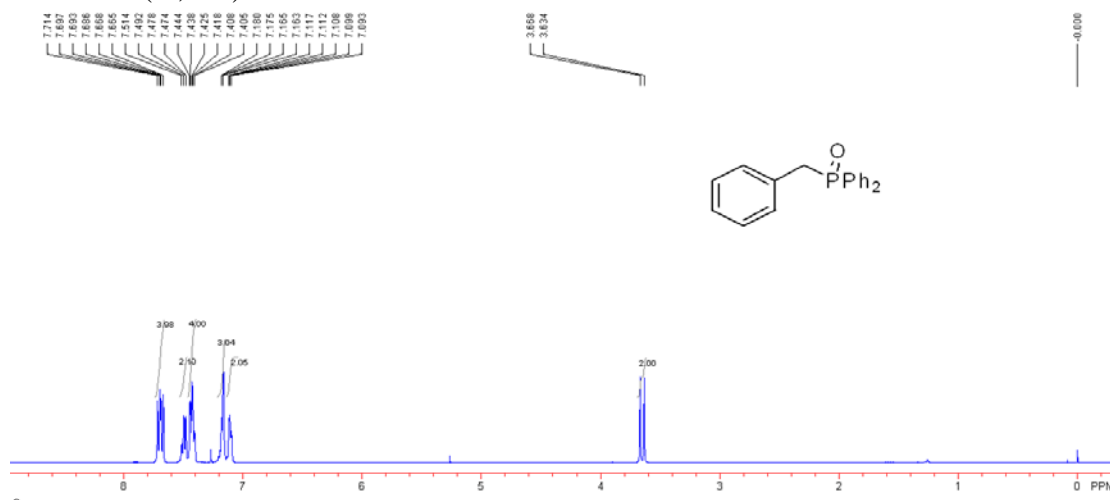

### Benzyl diphenylphosphine sulfoxide **4a** <sup>[2]</sup>

White solid, <sup>1</sup>H NMR (400 MHz, CDCl<sub>3</sub>, TMS) δ 3.84 (d, *J* = 13.6 Hz, 2H), 6.99 (d, *J* = 4.8 Hz, 2H), 7.14-7.16 (m, 3H), 7.42-7.49 (m, 6H), 7.75-7.80 (m, 4H).

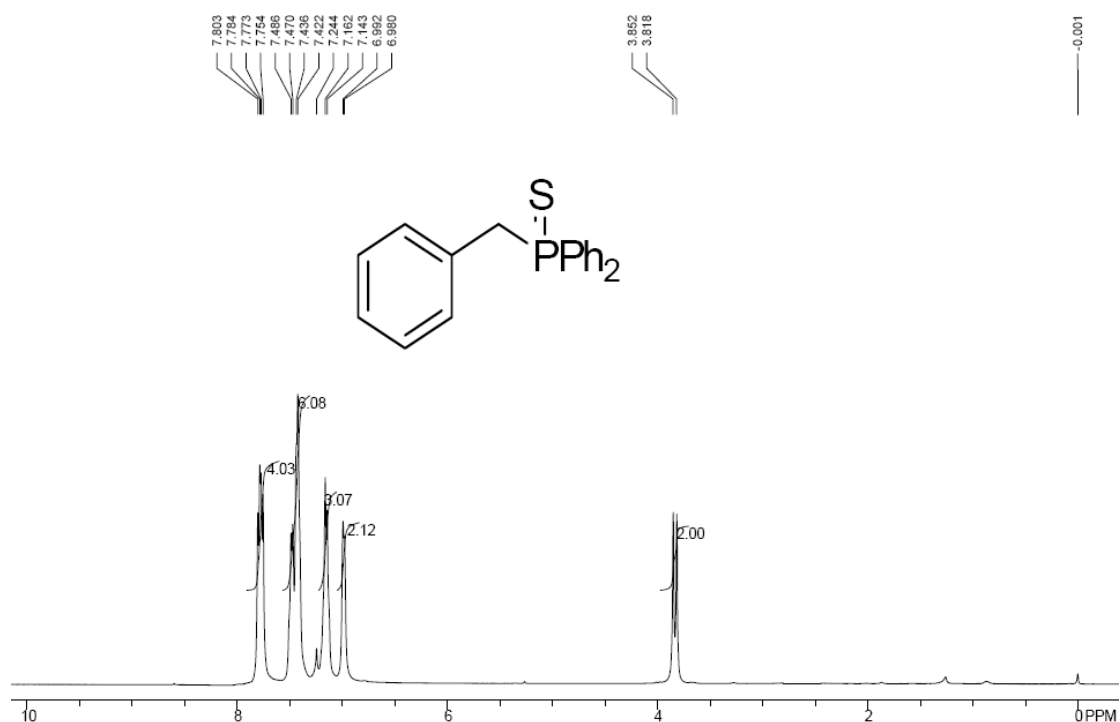

### 2-Fluorobenzyl diphenylphosphine oxide **3ab**

Light yellow solid, Mp 150.0-150.2 °C, <sup>1</sup>H NMR (400 MHz, CDCl<sub>3</sub>, TMS) δ 3.70 (d, *J* = 14.0 Hz, 2H), 6.88 (t, *J* = 9.2 Hz, 1H), 7.03 (t, *J* = 7.2 Hz, 1H), 7.12-7.17 (m, 1H), 7.41-7.46 (m, 5H) 7.49-7.53 (m, 2H), 7.70-7.75 (m, 4H). <sup>13</sup>C NMR (100 MHz, CDCl<sub>3</sub>, TMS) δ 29.79, 29.81, 30.47, 30.48, 114.94, 114.96, 115.17, 115.19, 118.5, 118.6, 118.64, 118.7, 124.05, 124.08, 124.1, 128.4, 128.49, 128.52, 128.55, 128.6, 128.63, 130.9, 131.0, 131.6, 131.8, 131.9, 132.02, 132.06, 132.1, 132.6, 159.2, 159.3, 161.7, 161.8. <sup>31</sup>P NMR (160 MHz, CDCl<sub>3</sub>, TMS) δ 29.40, 29.42. <sup>19</sup>F NMR (470 MHz, CDCl<sub>3</sub>, TMS) δ -117.09, -117.07; MS (ESI) *m/z* (%): 311.1 (M + H, 100); HRMS (Micromass LCT) Calcd for C<sub>19</sub>H<sub>17</sub>OFP: 311.1001, Found: 311.1000.

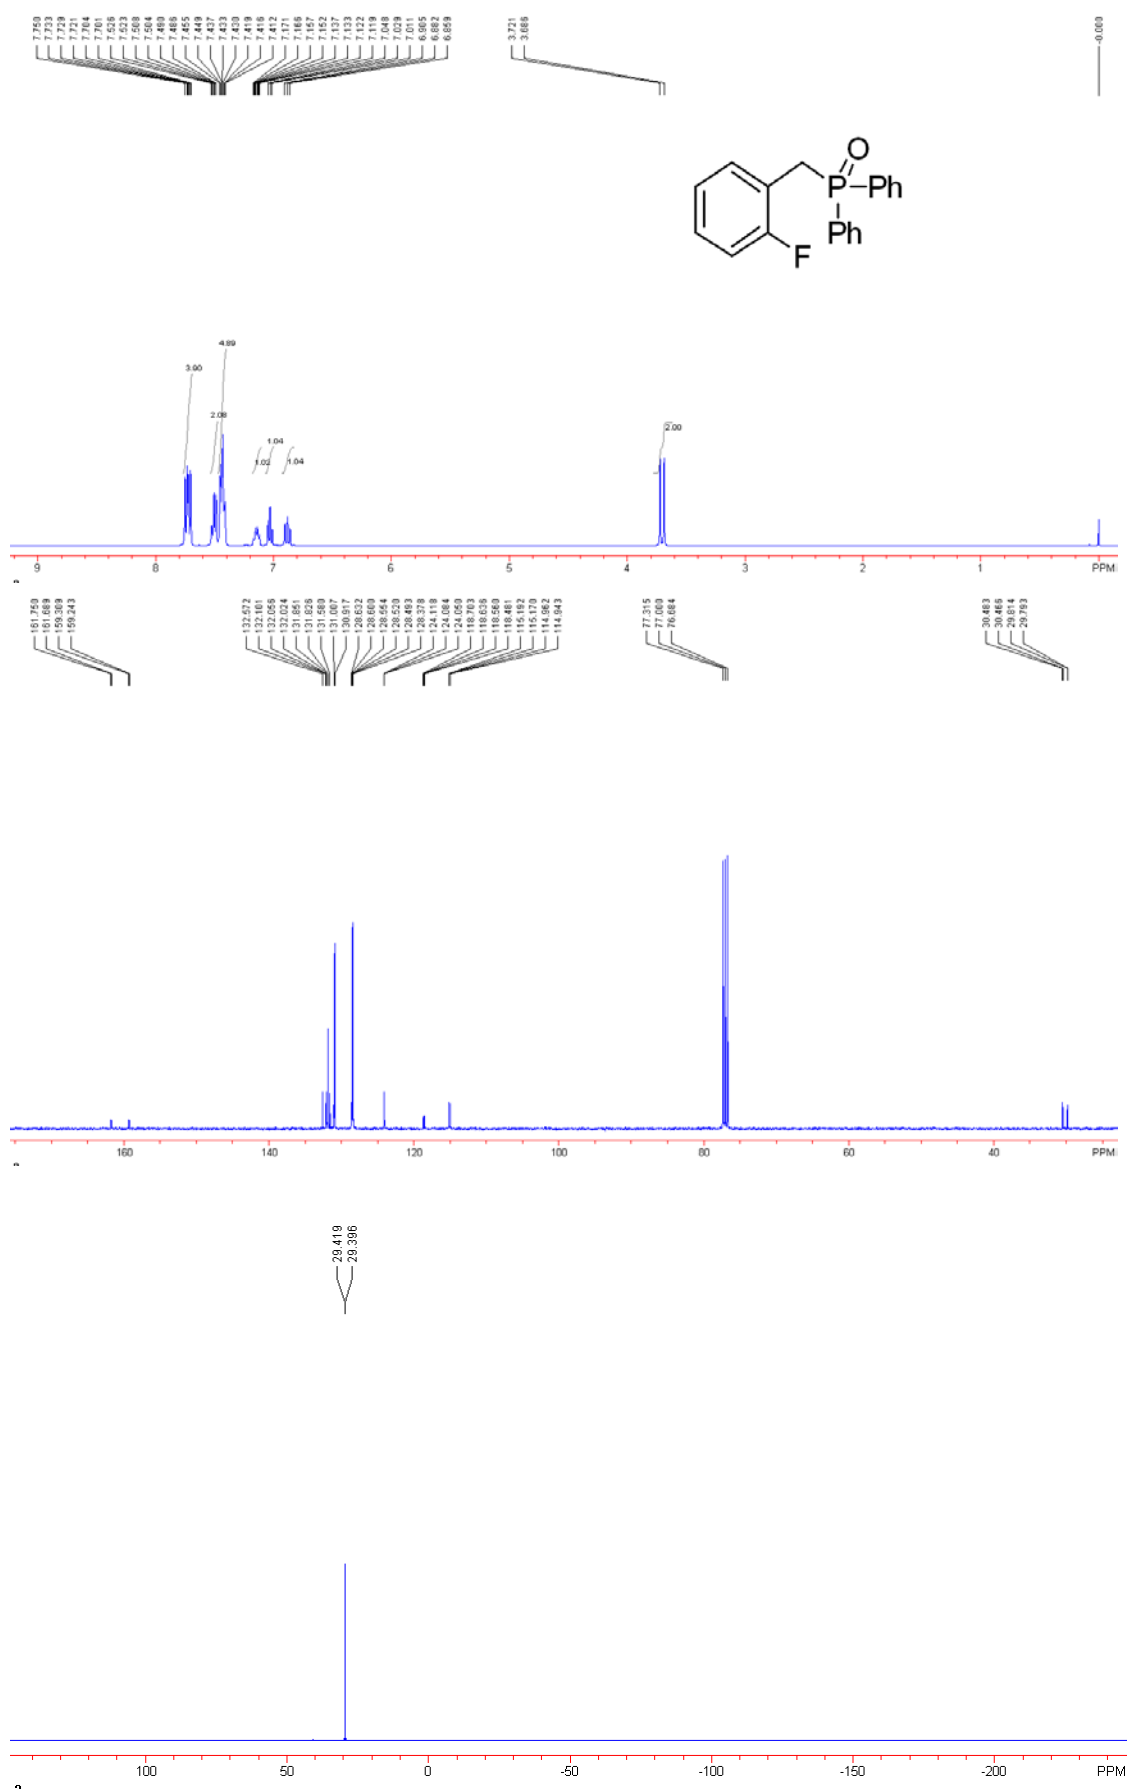

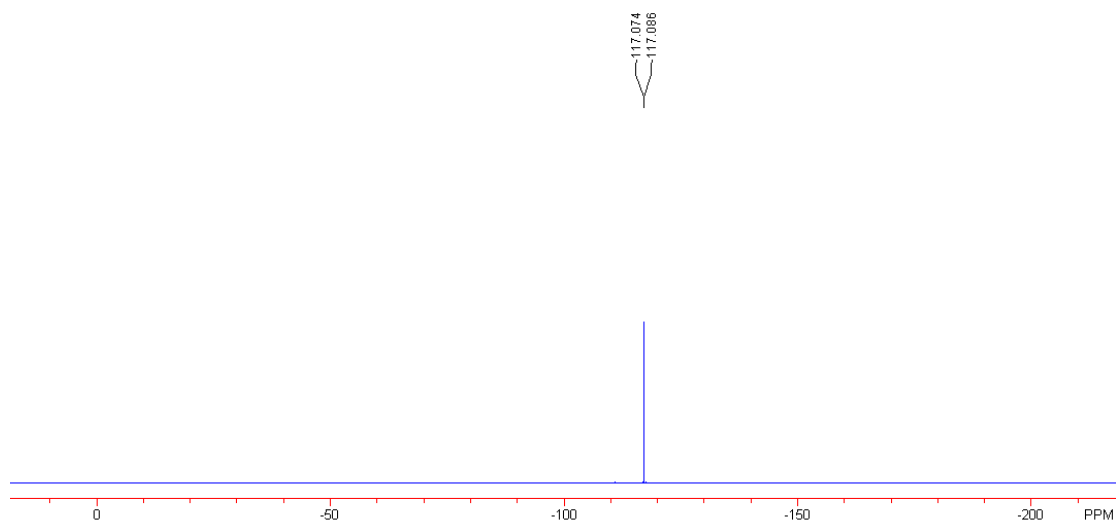

### 3-Fluorobenzyl diphenylphosphine oxide **3ac**

Light yellow solid, Mp 179.5-180.3 °C  $^1\text{H}$  NMR (400 MHz,  $\text{CDCl}_3$ , TMS)  $\delta$  3.64 (d,  $J = 13.6$  Hz, 2H), 6.80-6.92 (m, 3H), 7.15 (dd,  $J = 8.0, 14.4$  Hz, 1H), 7.43-7.47 (m, 4H), 7.51-7.55 (m, 2H), 7.67-7.72 (m, 4H).  $^{13}\text{C}$  NMR (100 MHz,  $\text{CDCl}_3$ , TMS)  $\delta$  37.49, 37.50, 38.1, 38.2, 113.66, 113.69, 113.86, 113.89, 116.88, 116.93, 117.10, 117.15, 125.79, 125.82, 125.84, 125.87, 128.5, 128.6, 129.67, 129.70, 129.76, 129.78, 131.0, 131.09, 131.4, 131.93, 131.96, 132.4, 133.5, 133.57, 133.64, 161.26, 161.28, 163.70, 163.73.  $^{31}\text{P}$  NMR (160 MHz,  $\text{CDCl}_3$ , TMS)  $\delta$  29.1.  $^{19}\text{F}$  NMR (470 MHz,  $\text{CDCl}_3$ , TMS)  $\delta$  -113.1. MS (ESI)  $m/z$  (%): 311.1 (M + H, 100); HRMS (Micromass LCT) Calcd for  $\text{C}_{19}\text{H}_{17}\text{OFP}$ : 311.1001, Found: 311.0999.

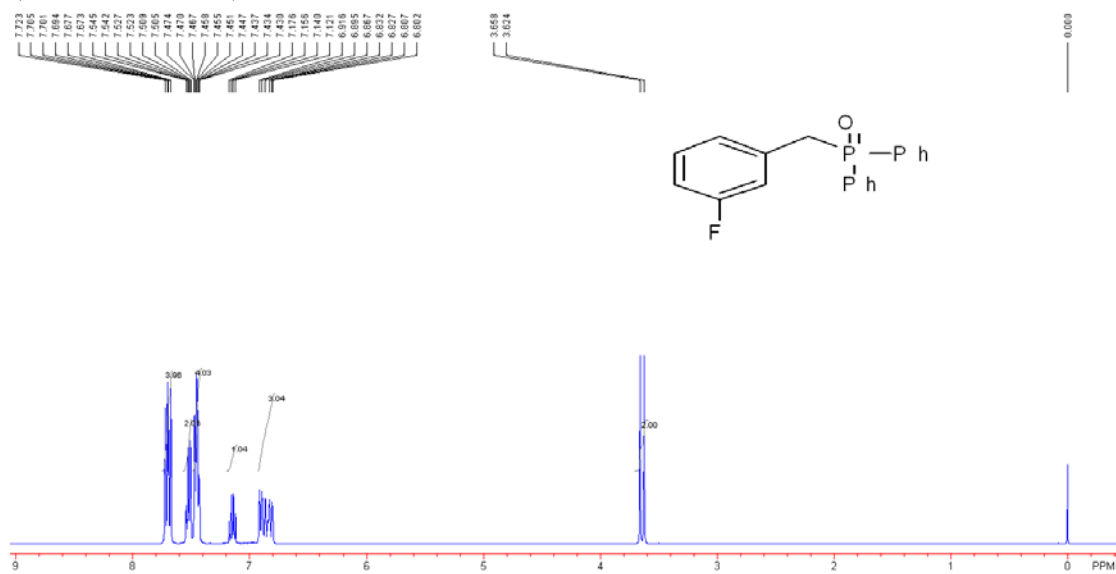

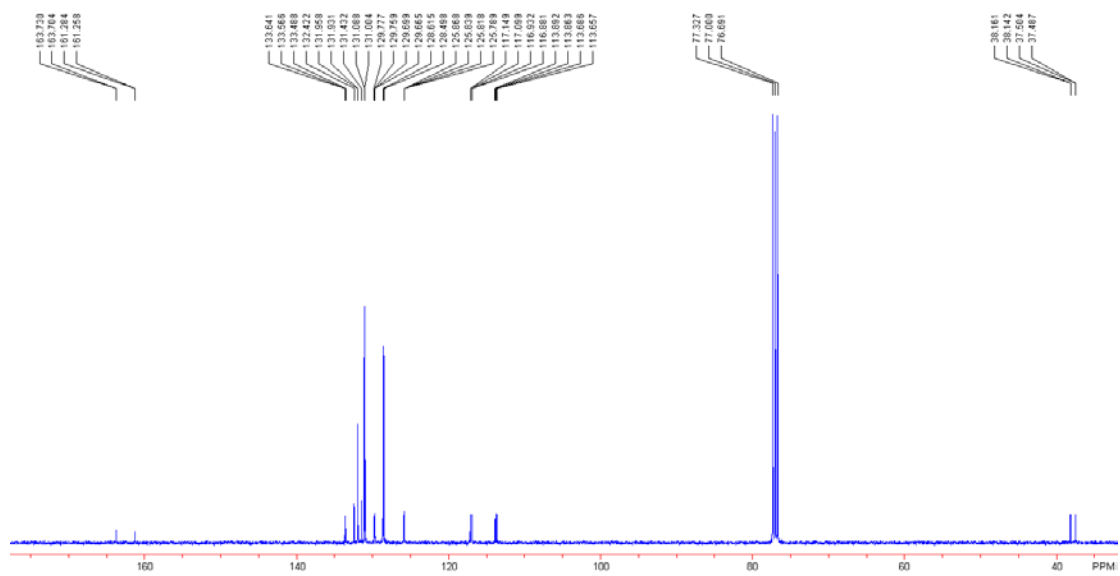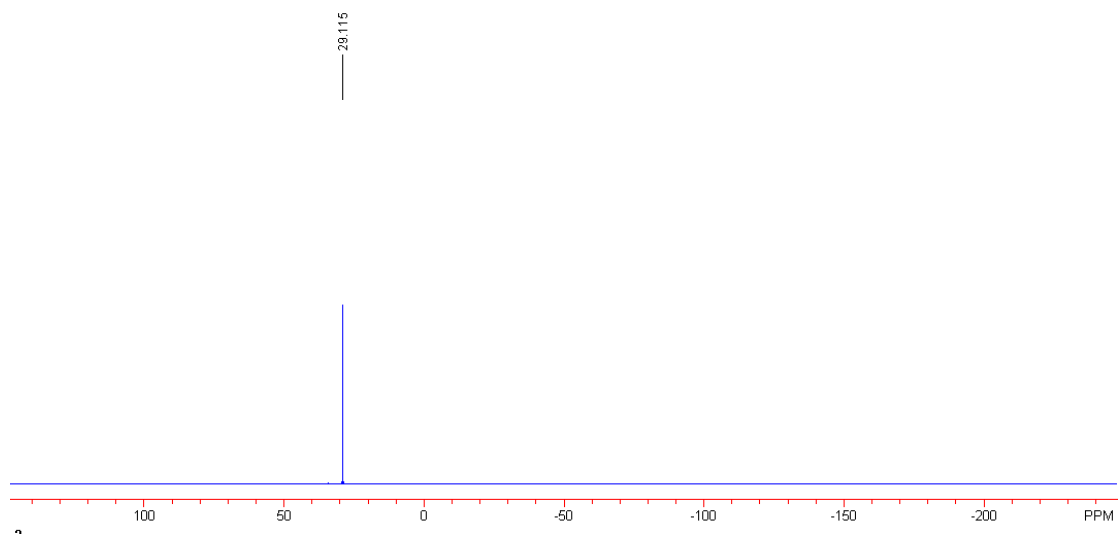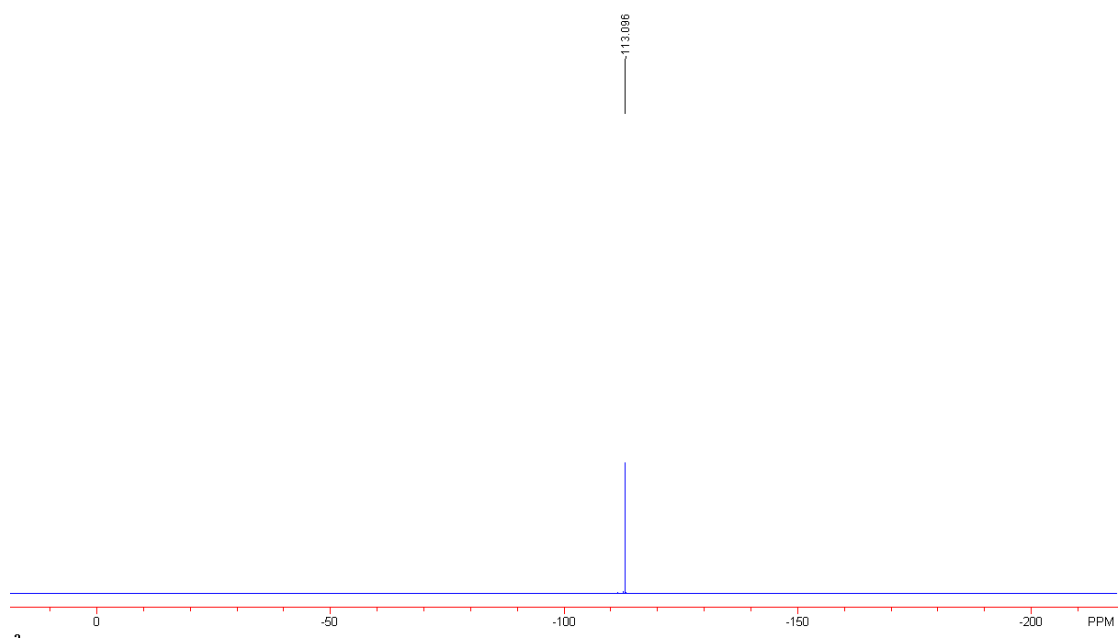

### 4-Fluorobenzyl diphenylphosphine oxide **3ad**

Light yellow solid, Mp 212.3-212.5 °C  $^1\text{H}$  NMR (400 MHz,  $\text{CDCl}_3$ , TMS)  $\delta$  3.62 (d,  $J = 13.6$  Hz, 2H), 6.87 (t,  $J = 8.4$  Hz, 2H), 7.05-7.09 (m, 2H), 7.42-7.47 (m, 4H), 7.50-7.54 (m, 2H), 7.66-7.7 (m, 4H).  $^{13}\text{C}$  NMR (100 MHz,  $\text{CDCl}_3$ , TMS)  $\delta$  36.8, 37.4, 115.10, 115.13, 115.31, 115.35, 126.70, 126.74, 126.78, 126.81, 128.4, 128.6, 131.0, 131.1, 131.4, 131.48, 131.50, 131.51, 131.6, 131.84, 131.86, 132.5, 160.6, 160.61, 163.01, 163.05.  $^{31}\text{P}$  NMR (160 MHz,  $\text{CDCl}_3$ , TMS)  $\delta$  29.31, 29.33.  $^{19}\text{F}$  NMR (470 MHz,  $\text{CDCl}_3$ , TMS)  $\delta$  -115.88, -115.87. MS (ESI)  $m/z$  (%): 311.1 (M + H, 100); HRMS (Micromass LCT) Calcd for  $\text{C}_{19}\text{H}_{17}\text{OFP}$ : 311.1001, Found: 311.1005.

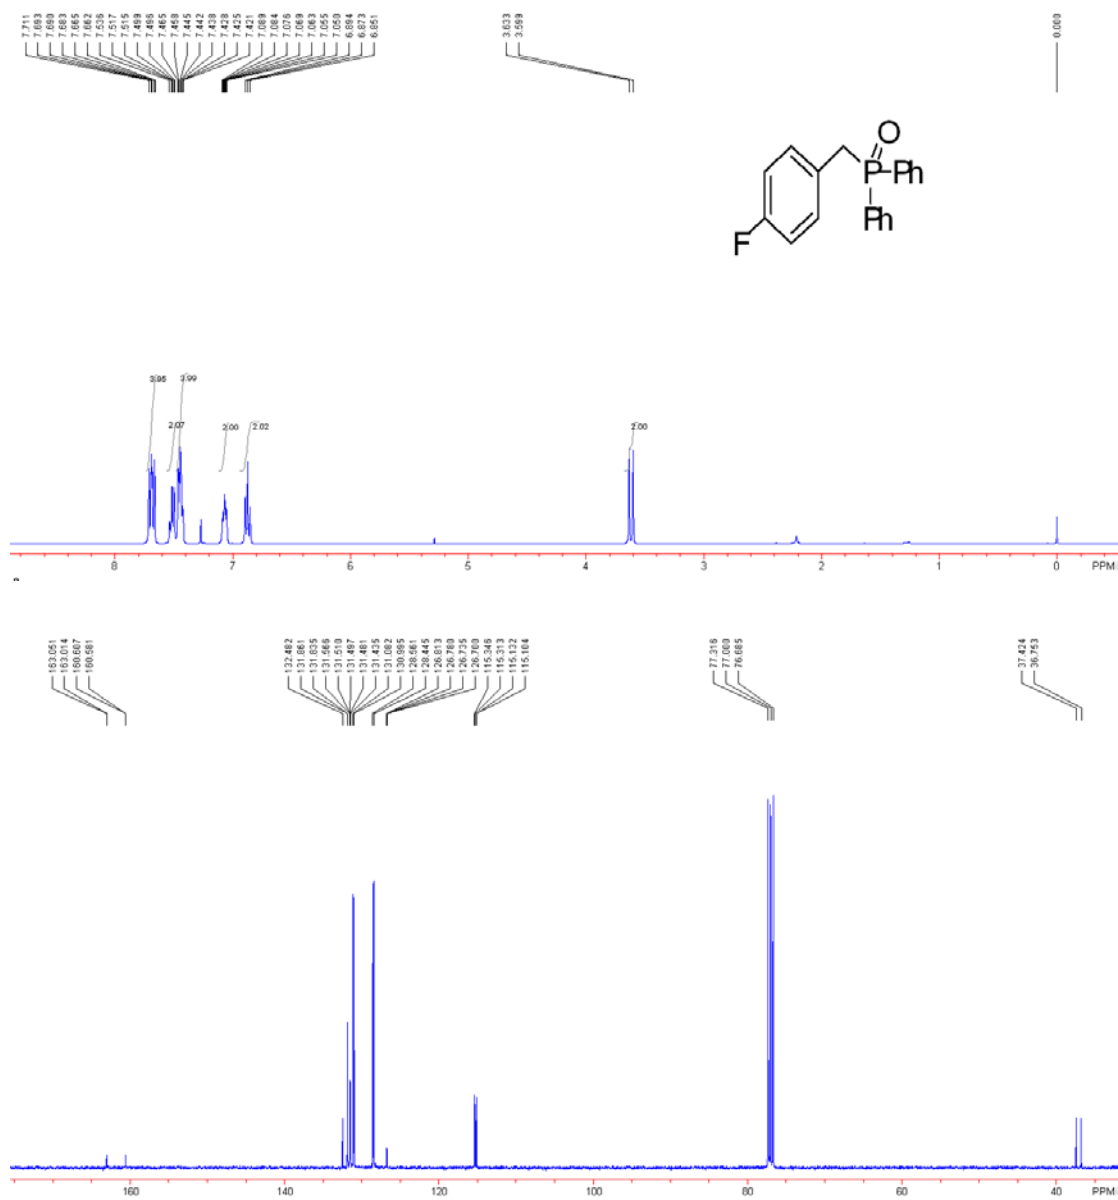



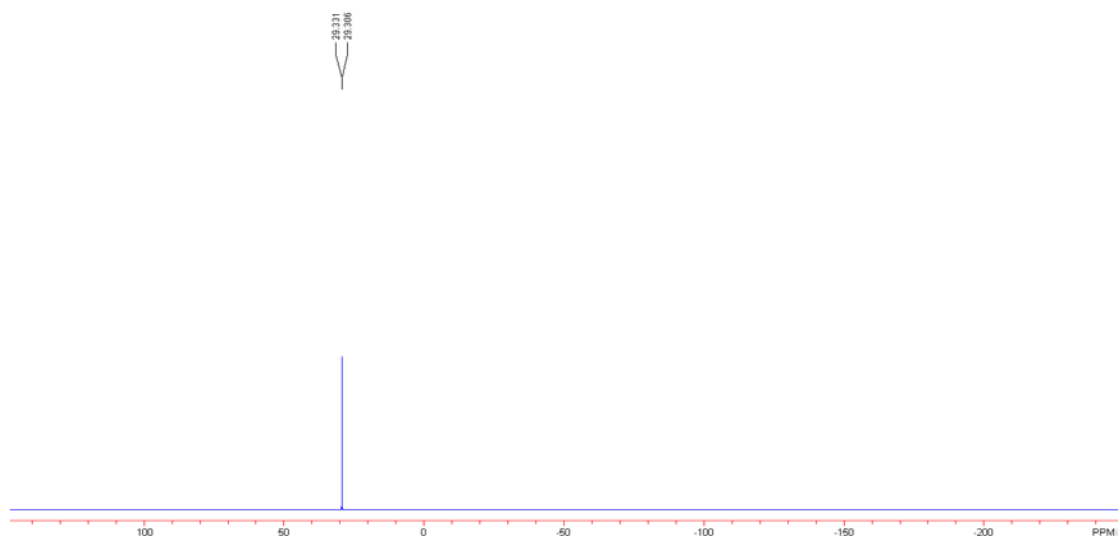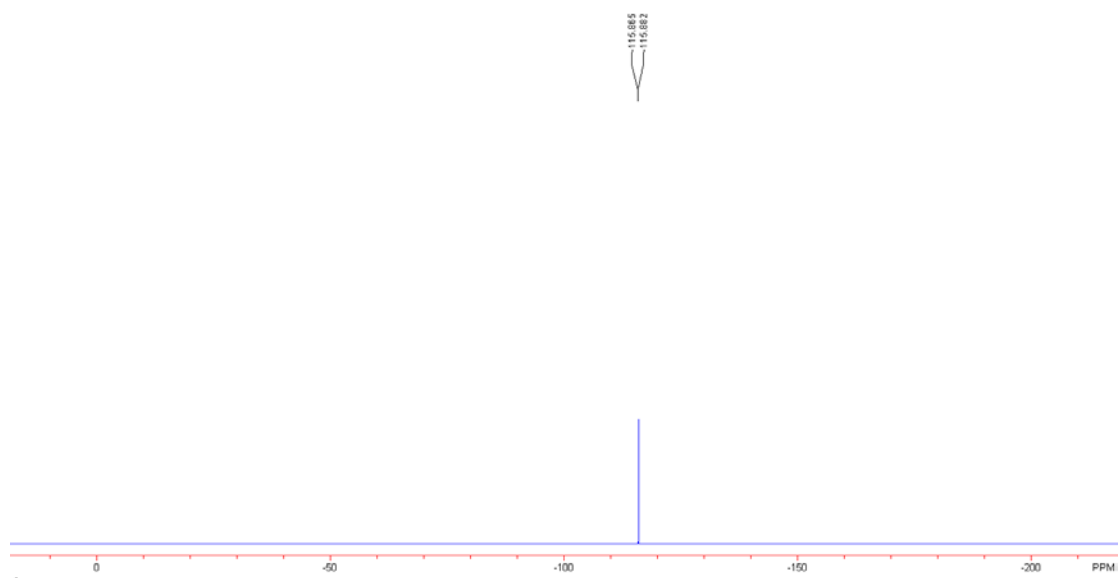

4-Chlorobenzyl diphenylphosphine oxide **3ae** <sup>[3]</sup>

White solid, Mp 240.3-241.0 °C, <sup>1</sup>H NMR (400 MHz, CDCl<sub>3</sub>, TMS) δ 3.61 (d, *J* = 13.6 Hz, 2H), 7.04 (dd, *J* = 2.0, 8.4 Hz, 2H), 7.16 (d, *J* = 8.4 Hz, 2H), 7.43-7.48 (m, 4H), 7.51-7.55 (m, 2H), 7.67-7.71 (m, 4H). <sup>13</sup>C NMR (100 MHz, CDCl<sub>3</sub>, TMS) δ 37.1, 37.7, 128.5, 128.6, 129.6, 129.7, 131.0, 131.1, 131.31, 131.36, 131.44, 131.92, 131.95, 132.4, 132.77, 132.81. <sup>31</sup>P NMR (160 MHz, CDCl<sub>3</sub>, TMS) δ 29.1. MS (ESI) *m/z* (%): 327.1 (M + H, 100); HRMS (Micromass LCT) Calcd for C<sub>19</sub>H<sub>17</sub>ClOP: 327.0706, Found: 327.0706.

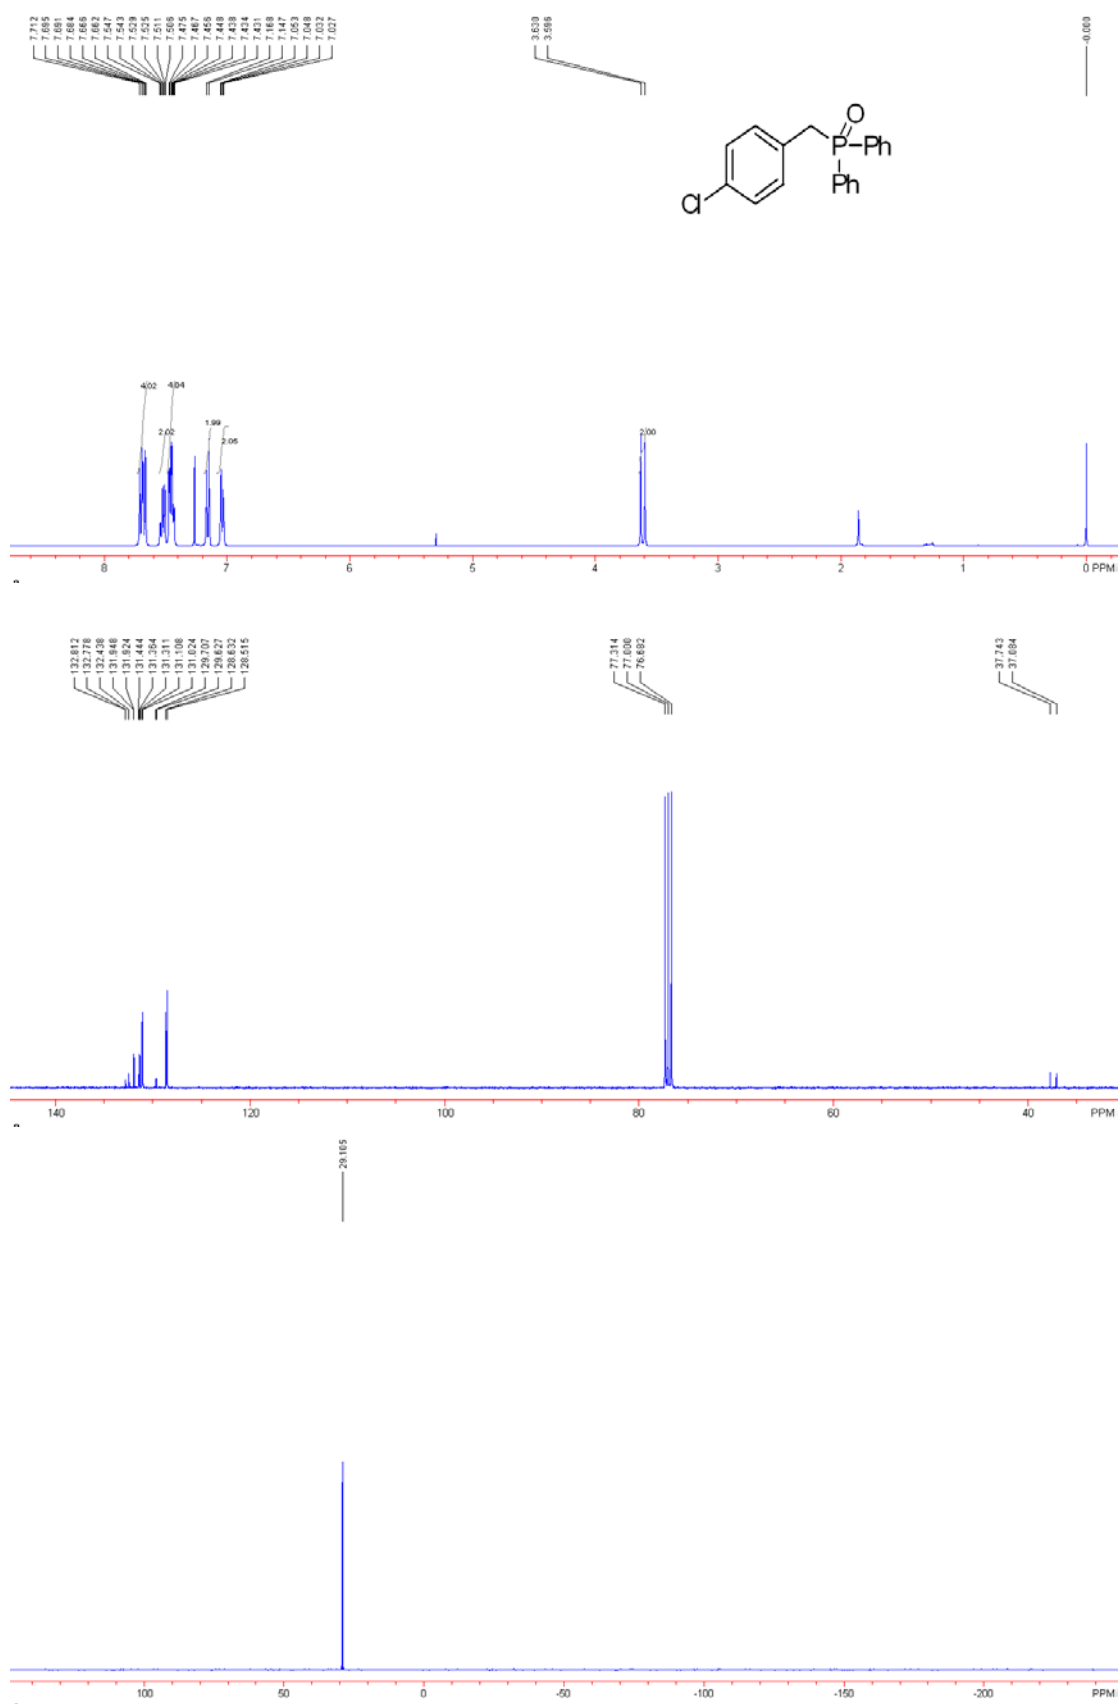

4-Bromobenzyl diphenylphosphine oxide **3af** <sup>[1]</sup>

Light yellow solid, Mp 239.8-240.5 °C,  $^1\text{H}$  NMR (400 MHz,  $\text{CDCl}_3$ , TMS)  $\delta$  3.60 (d,  $J = 13.6$  Hz, 2H), 6.98 (dd,  $J = 2.0, 8.4$  Hz, 2H), 7.31 (d,  $J = 8.4$  Hz, 2H), 7.43-7.48 (m, 4H), 7.51-7.55 (m, 2H), 7.66-7.71 (m, 4H).  $^{13}\text{C}$  NMR (100 MHz,  $\text{CDCl}_3$ , TMS)  $\delta$  37.1, 37.7, 128.5, 128.6, 129.6, 129.7, 131.0, 131.1, 131.31, 131.36, 131.44, 131.92, 131.95, 132.4, 132.78, 132.81.  $^{31}\text{P}$  NMR (160 MHz,  $\text{CDCl}_3$ , TMS)  $\delta$  29.0. MS (ESI)  $m/z$  (%): 371.0 (M + H, 100); HRMS (Micromass LCT) Calcd for  $\text{C}_{19}\text{H}_{17}\text{BrOP}$ : 371.0200, Found: 371.0204.

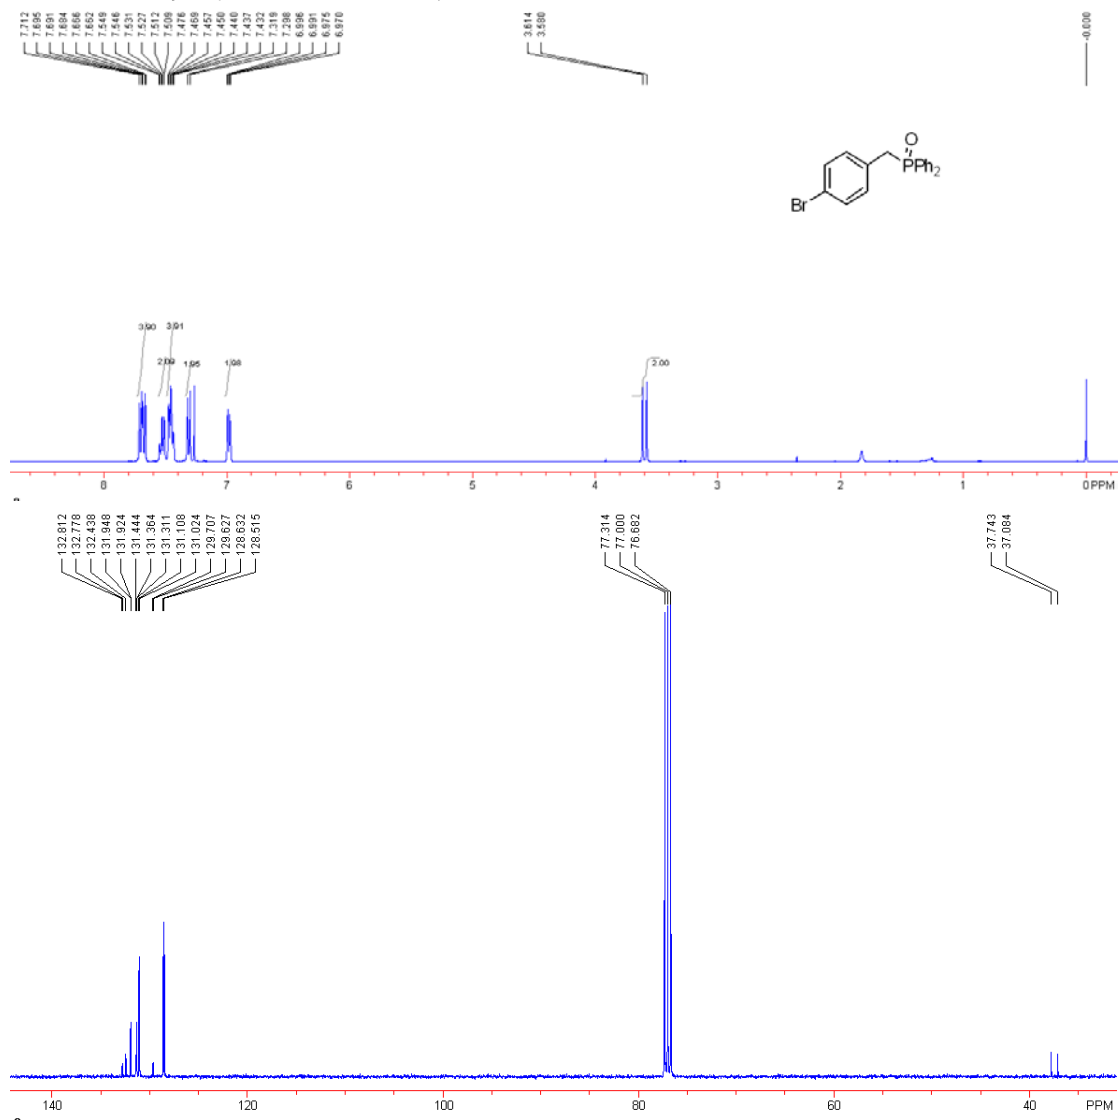

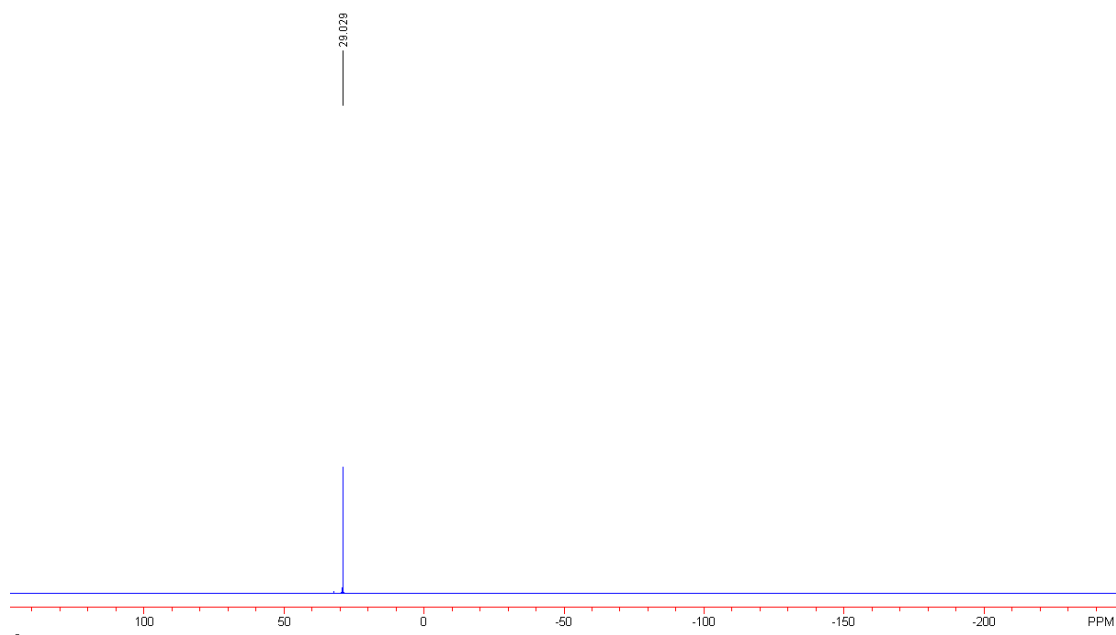

#### 4-(Trifluoromethyl)benzyl diphenylphosphine oxide **3ag**

White solid, Mp 212.5-213.0 °C.  $^1\text{H NMR}$  (400 MHz,  $\text{CDCl}_3$ , TMS)  $\delta$  3.70 (d,  $J = 14.0$  Hz, 2H), 7.23 (d,  $J = 7.2$  Hz, 2H), 7.43-7.48 (m, 6H), 7.51-7.56 (m, 2H), 7.68-7.73 (m, 4H).  $^{13}\text{C NMR}$  (100 MHz,  $\text{CDCl}_3$ , TMS)  $\delta$  37.6, 38.3, 53.4, 122.7, 125.17, 125.20, 125.24, 125.4, 128.6, 128.7, 128.81, 128.83, 129.12, 129.15, 130.3, 130.4, 131.0, 131.1, 131.3, 132.03, 132.06, 132.3, 135.4, 135.5.  $^{31}\text{P NMR}$  (160 MHz,  $\text{CDCl}_3$ , TMS)  $\delta$  29.0.  $^{19}\text{F NMR}$  (470 MHz,  $\text{CDCl}_3$ , TMS)  $\delta$  -62.509, -62.501. MS (ESI)  $m/z$  (%): 361.1 (M + H, 100); HRMS (Micromass LCT) Calcd for  $\text{C}_{19}\text{H}_{17}\text{F}_3\text{OP}$ : 361.0969, Found: 361.0967

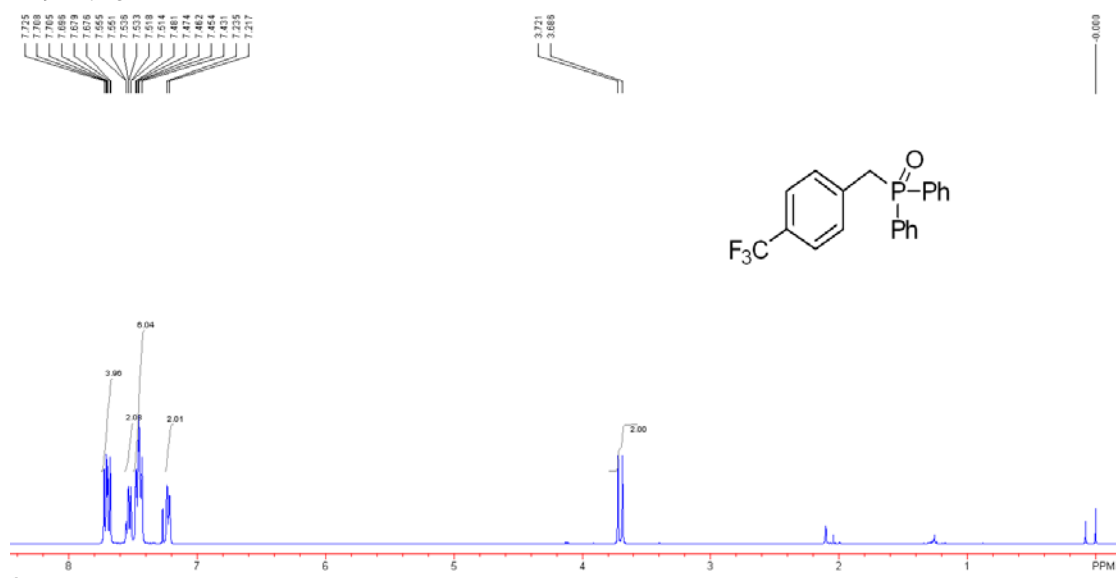

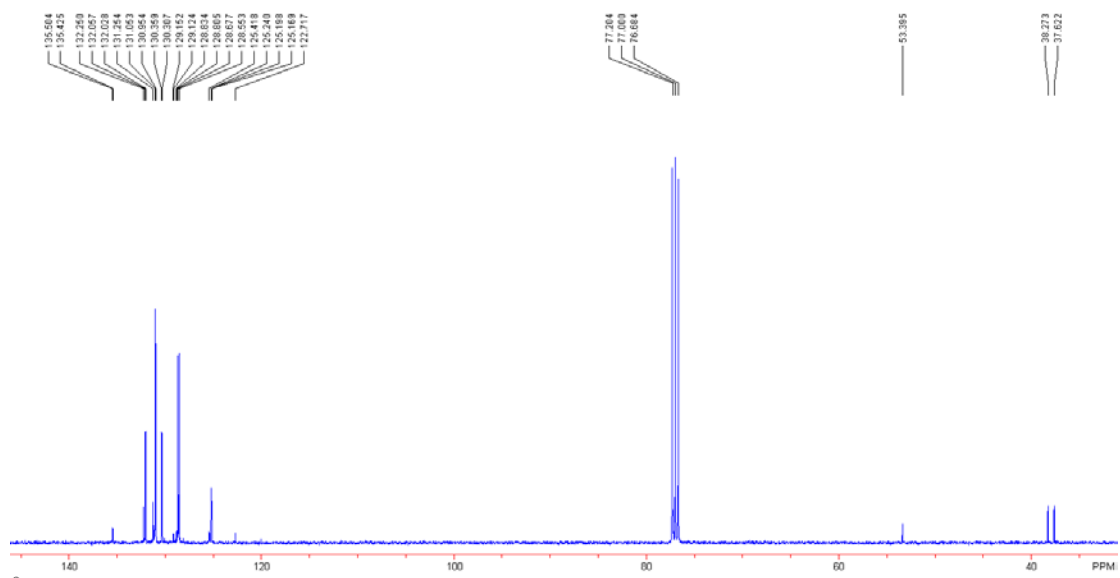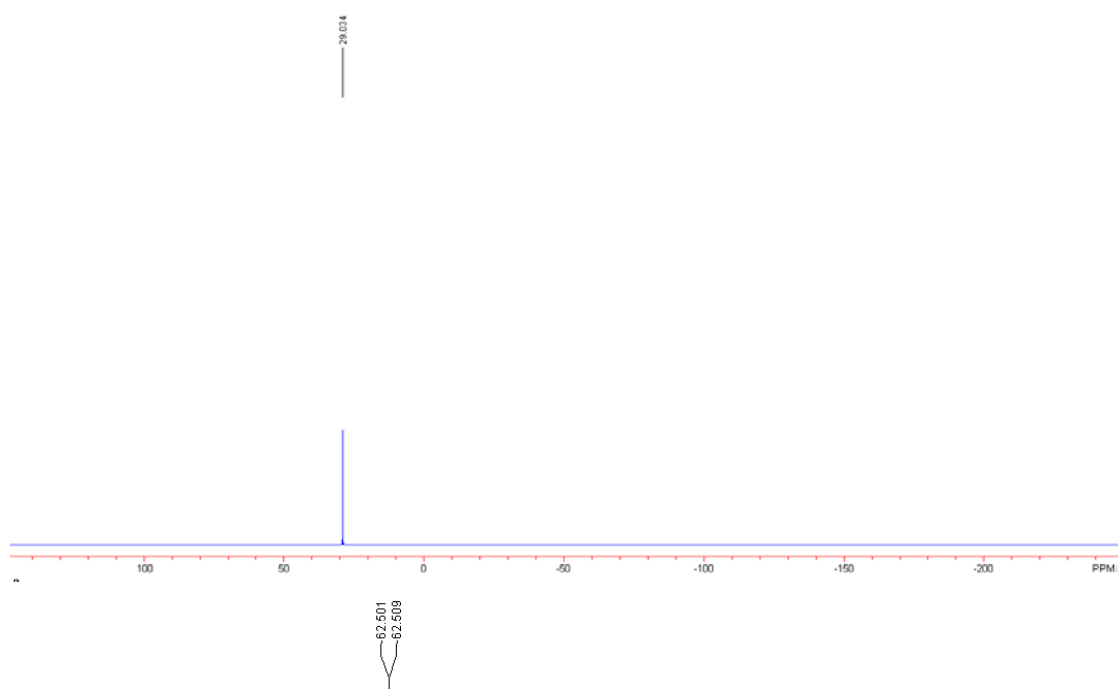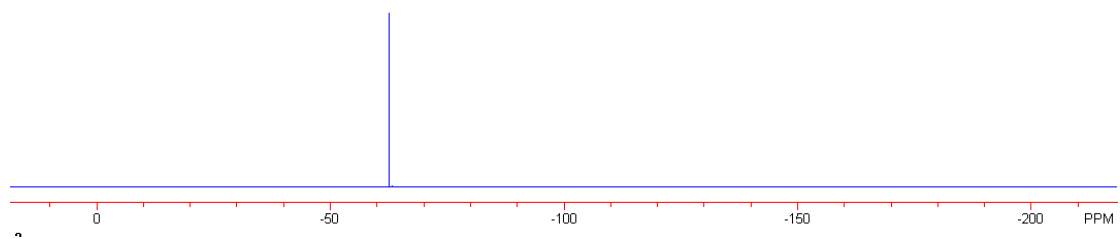

4-Methylbenzyl diphenylphosphine oxide **3ah** <sup>[3]</sup>

White solid, Mp 156.3-156.5 °C,  $^1\text{H}$  NMR (400 MHz,  $\text{CDCl}_3$ , TMS)  $\delta$  2.25 (d,  $J = 1.6$  Hz, 3H), 3.62 (d,  $J = 13.2$  Hz, 2H), 6.99 (s, 4H), 7.41-7.45 (, 4H), 7.48-7.52 (m, 2H), 7.67-7.72 (m, 4H).  $^{13}\text{C}$  NMR (100 MHz,  $\text{CDCl}_3$ , TMS)  $\delta$  21.0, 37.2, 37.9, 127.76, 127.83, 128.3, 128.5, 129.0, 129.1, 129.87, 129.93, 131.1, 131.2, 131.65, 131.69, 131.8, 132.8, 136.28, 136.30.  $^{31}\text{P}$  NMR (160 MHz,  $\text{CDCl}_3$ , TMS)  $\delta$  29.4. MS (ESI)  $m/z$  (%): 307.1 (M + H, 100); HRMS (Micromass LCT) Calcd for  $\text{C}_{20}\text{H}_{20}\text{OP}$ : 307.1252, Found: 307.1256.

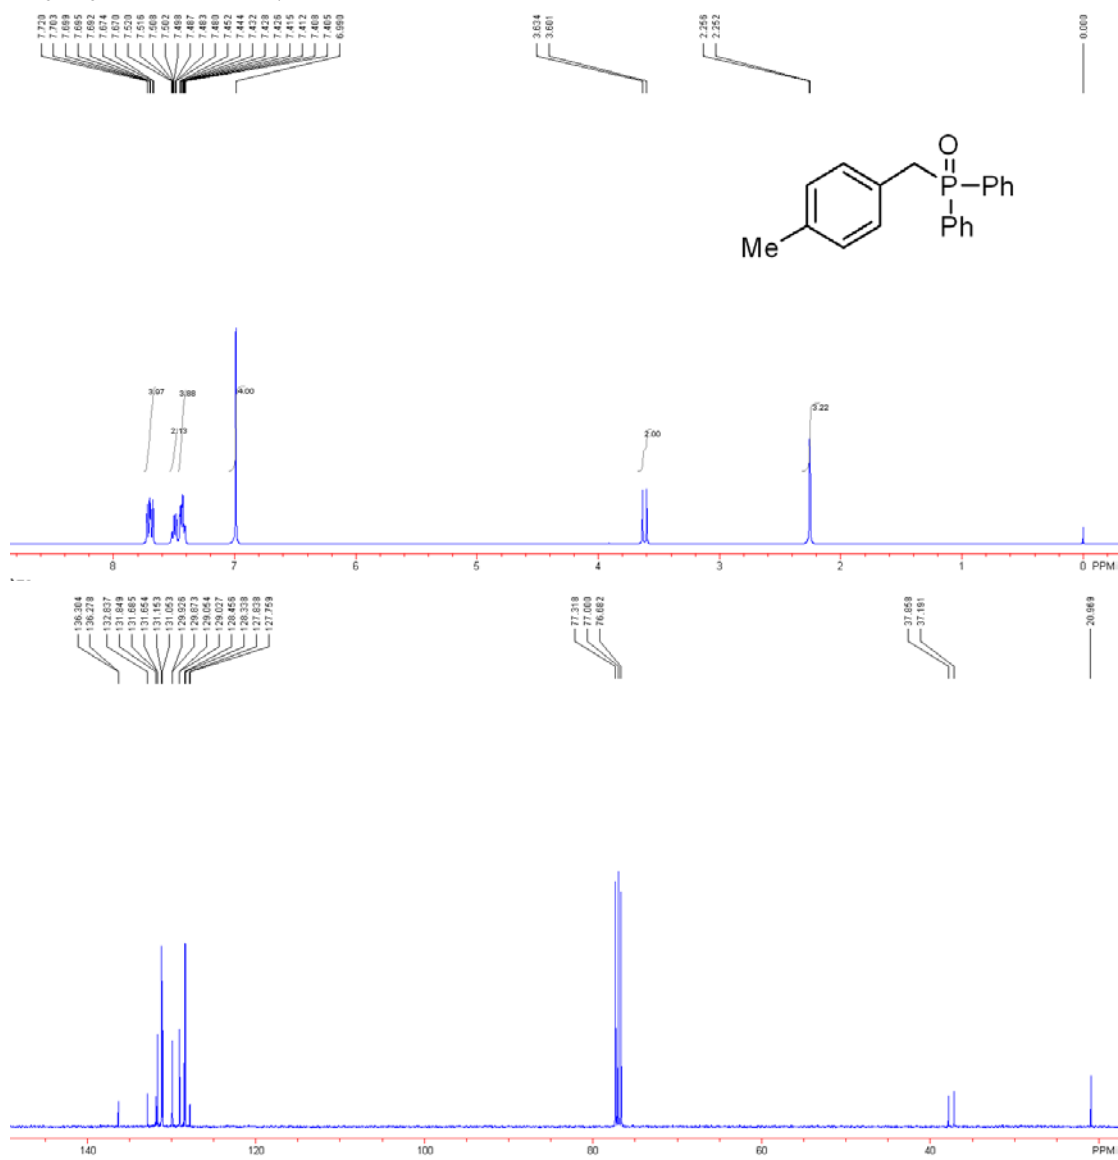

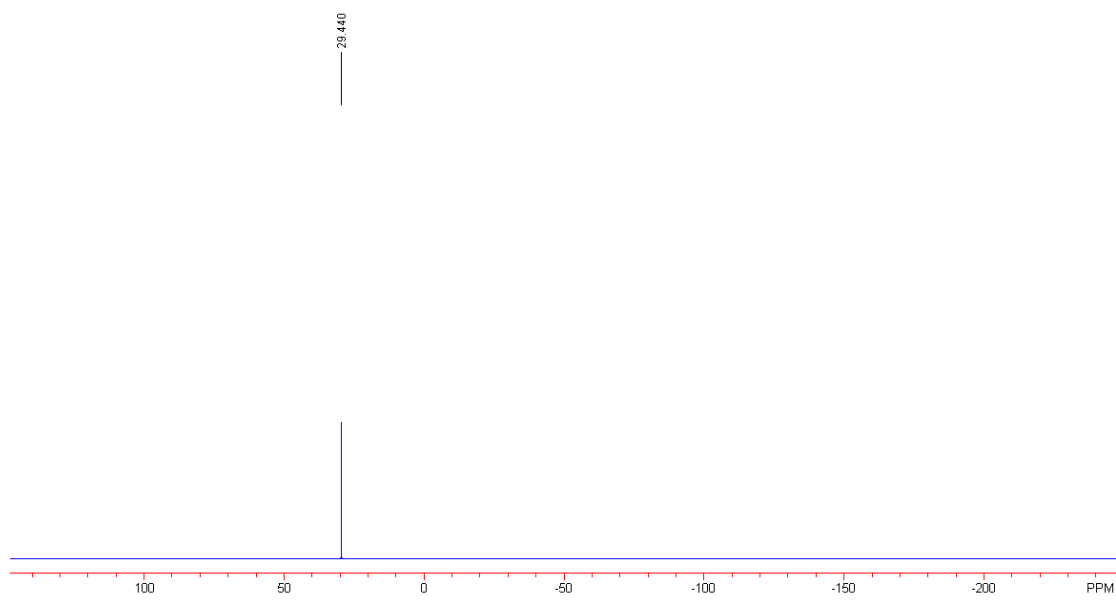

### 4-Methoxybenzyl diphenylphosphine oxide **3ai** <sup>[3]</sup>

White solid, Mp 222.4-223.2 °C, <sup>1</sup>H NMR (400 MHz, CDCl<sub>3</sub>, TMS) δ 3.59 (d, *J* = 13.2 Hz, 2H), 3.73 (s, 3H), 6.73 (d, *J* = 8.8 Hz, 2H), 7.02 (dd, *J* = 2.0, 8.4 Hz, 2H), 7.41-7.45 (m, 4H), 7.48-7.52 (m, 2H). <sup>13</sup>C NMR (100 MHz, CDCl<sub>3</sub>, TMS) δ 36.7, 37.3, 55.1, 113.81, 113.84, 122.8, 122.9, 128.4, 128.5, 131.0, 131.1, 131.2, 131.68, 131.71, 131.8, 132.8, 158.4, 158.5. <sup>31</sup>P NMR (160 MHz, CDCl<sub>3</sub>, TMS) δ 29.5. MS (ESI) *m/z* (%): 323.1 (M + H, 100); HRMS (Micromass LCT) Calcd for C<sub>20</sub>H<sub>20</sub>O<sub>2</sub>P: 323.1201, Found: 323.1198.

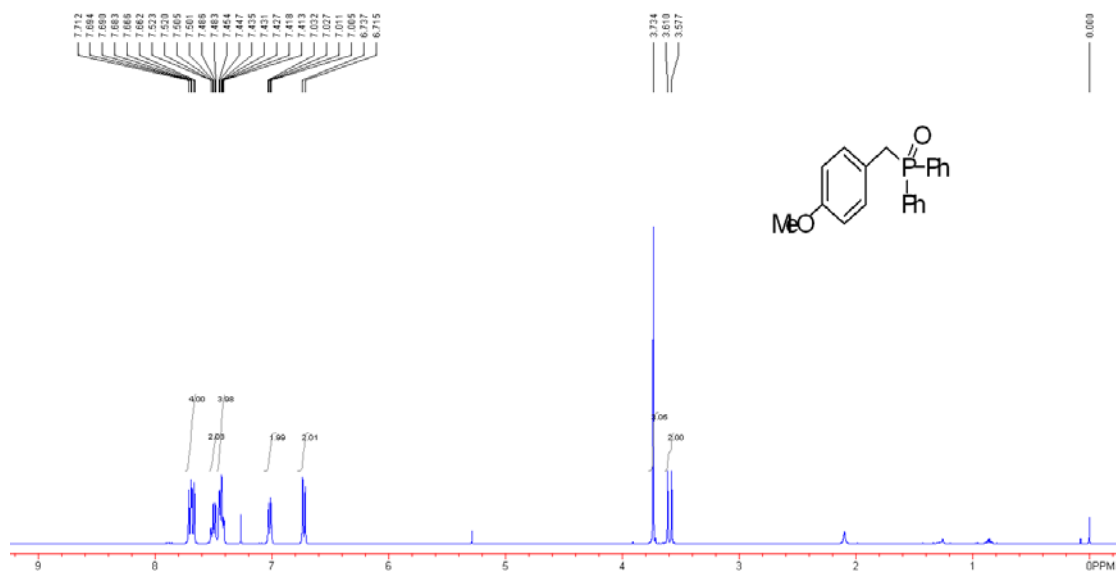

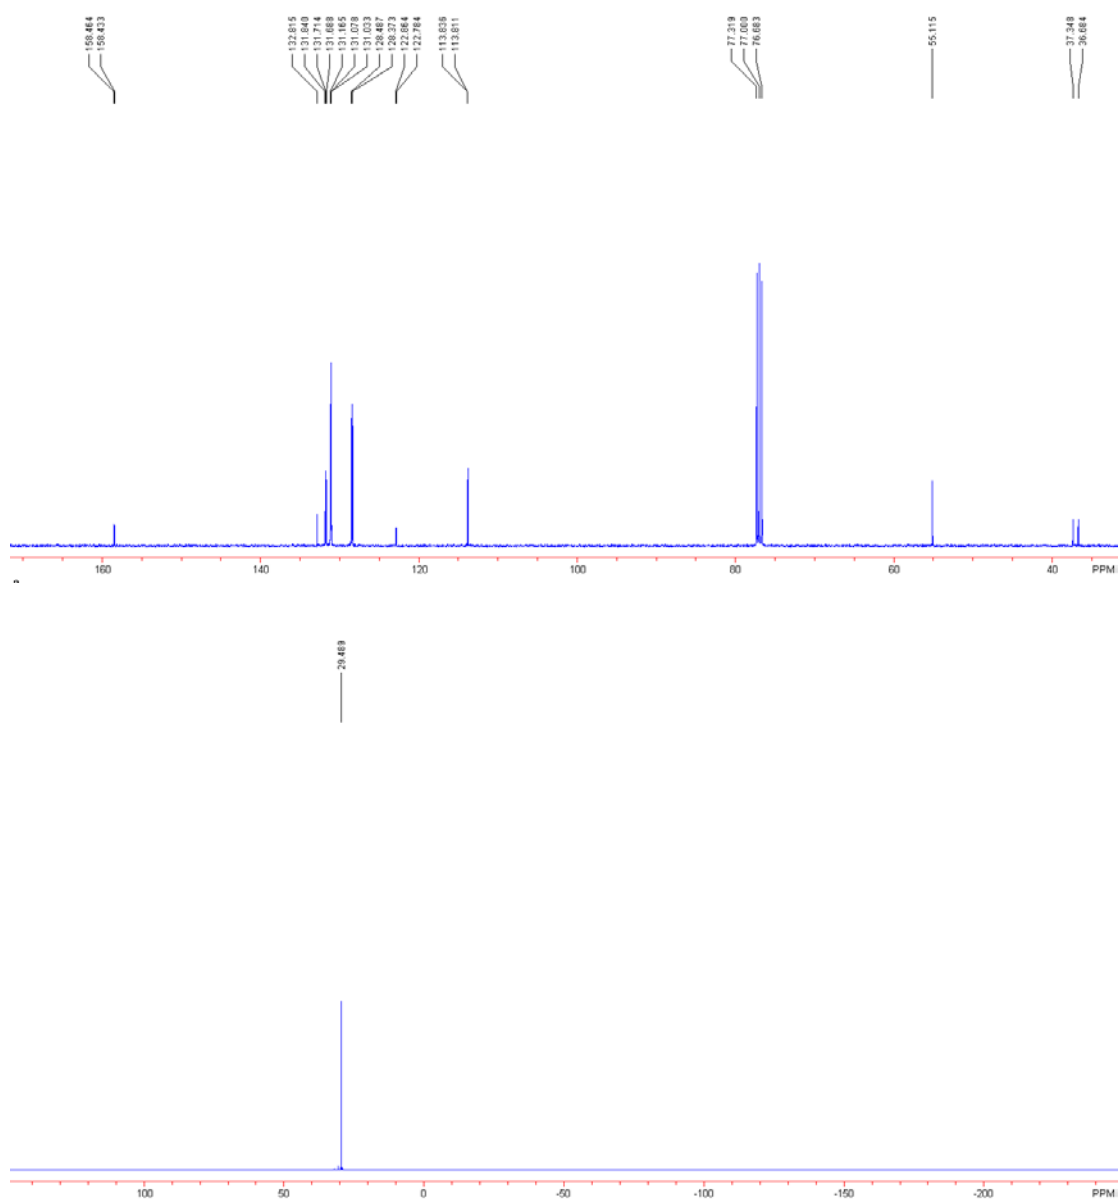

### 2,4-Dimethylbenzyl diphenylphosphine oxide **3aj**

White solid, Mp 156.3-156.5, <sup>1</sup>H NMR (400 MHz, CDCl<sub>3</sub>, TMS)

δ 2.11 (s, 3H), 2.24 (s, 3H), 3.63 (d, *J* = 13.6 Hz, 2H), 6.78-6.84 (m, 2H), 6.91 (s, 1H), 7.41-7.46 (m, 4H), 7.50-7.54 (m, 2H), 7.65-7.70 (m, 4H). <sup>13</sup>C NMR (100 MHz, CDCl<sub>3</sub>, TMS) δ 19.84, 19.85, 20.8, 34.2, 35.1, 126.2, 126.29, 126.33, 128.2, 128.4, 130.4, 130.98, 131.08, 131.10, 131.12, 131.59, 131.63, 131.8, 133.1, 136.29, 136.33, 137.0, 137.1. <sup>31</sup>P NMR (160 MHz, CDCl<sub>3</sub>, TMS) δ 29.5. MS (ESI) *m/z* (%): 321.1 (M + H, 100); HRMS (Micromass LCT) Calcd for C<sub>21</sub>H<sub>22</sub>OP: 321.1408, Found: 321.1403.



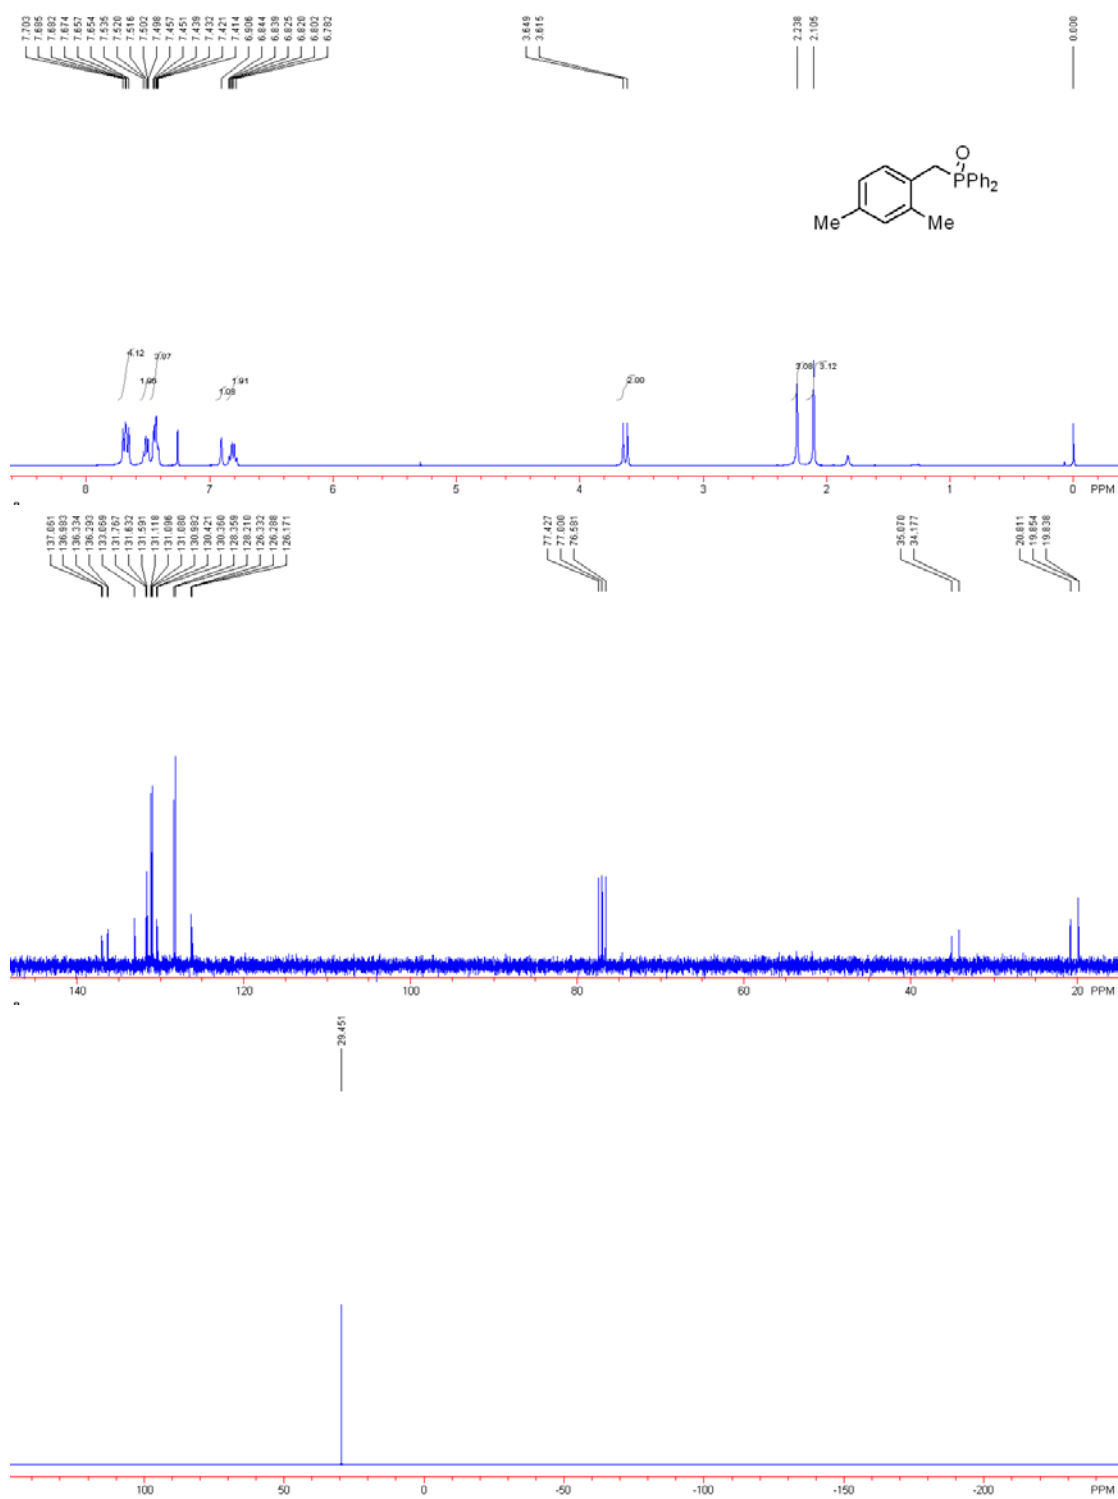

### 2,4,6-Trimethylbenzyl diphenylphosphine oxide **3ak**

White solid, Mp 180.3-181.5 °C, <sup>1</sup>H NMR (400 MHz, CDCl<sub>3</sub>, TMS) δ 1.99 (s, 6H), 2.23 (d, *J* = 1.6 Hz, 3H), 3.70 (d, *J* = 14.0 Hz, 2H), 6.77 (s, 2H), 7.40-7.44 (m, 4H), 7.51 (dd, *J* = 6.0, 7.6 Hz, 2H), 7.64-7.68 (m, 4H). <sup>13</sup>C NMR (100

MHz, CDCl<sub>3</sub>, TMS)  $\delta$  20.57, 20.59, 20.8, 32.4, 33.1, 125.3, 125.4, 128.3, 128.4, 128.98, 129.01, 131.1, 131.2, 131.69, 131.72, 132.5, 133.5, 136.00, 136.04, 137.6, 137.7. <sup>31</sup>P NMR (160 MHz, CDCl<sub>3</sub>, TMS)  $\delta$  28.7. MS (ESI) *m/z* (%): 335.2 (M + H, 100); HRMS (Micromass LCT) Calcd for C<sub>23</sub>H<sub>24</sub>OP: 335.1565, Found: 335.1569.

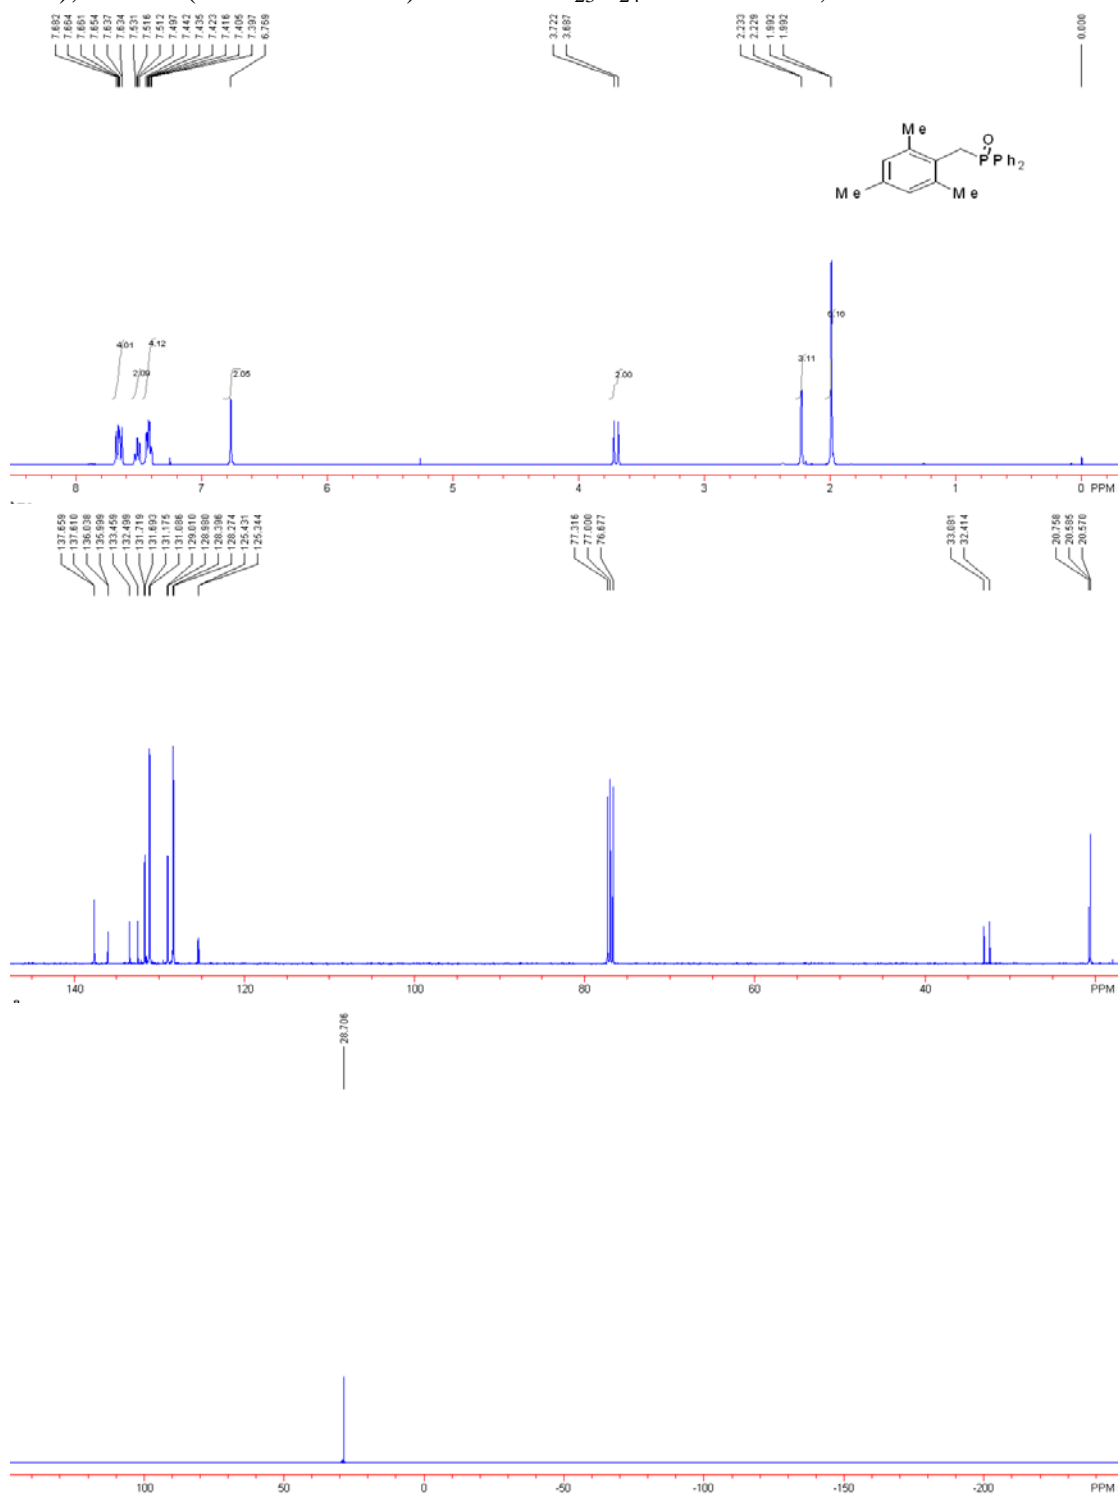

(Furan-2-ylmethyl)diphenylphosphine oxide **3ai** <sup>[4]</sup>

White solid, Mp 145.0-146.1 °C  $^1\text{H}$  NMR (400 MHz,  $\text{CDCl}_3$ , TMS)  $\delta$  3.88 (d,  $J = 12.8$  Hz, 2H), 6.83-6.86 (m, 2H), 7.08-7.10 (m, 1H), 7.43-7.48 (m, 4H), 7.51-7.55 (m, 2H), 7.70-7.75 (m, 4H).  $^{13}\text{C}$  NMR (100 MHz,  $\text{CDCl}_3$ , TMS)  $\delta$  32.2, 32.8, 124.84, 124.87, 127.0, 127.7, 127.8, 128.5, 128.6, 128.7, 131.00, 131.08, 131.18, 131.20, 131.8, 131.90, 131.94, 131.96, 132.10, 132.19.  $^{31}\text{P}$  NMR (160 MHz,  $\text{CDCl}_3$ , TMS)  $\delta$  28.5. MS (ESI)  $m/z$  (%): 335.2 (M + K, 100); HRMS (Micromass LCT) Calcd for  $\text{C}_{17}\text{H}_{15}\text{O}_2\text{PK}$ : 321.0447, Found: 321.0443.

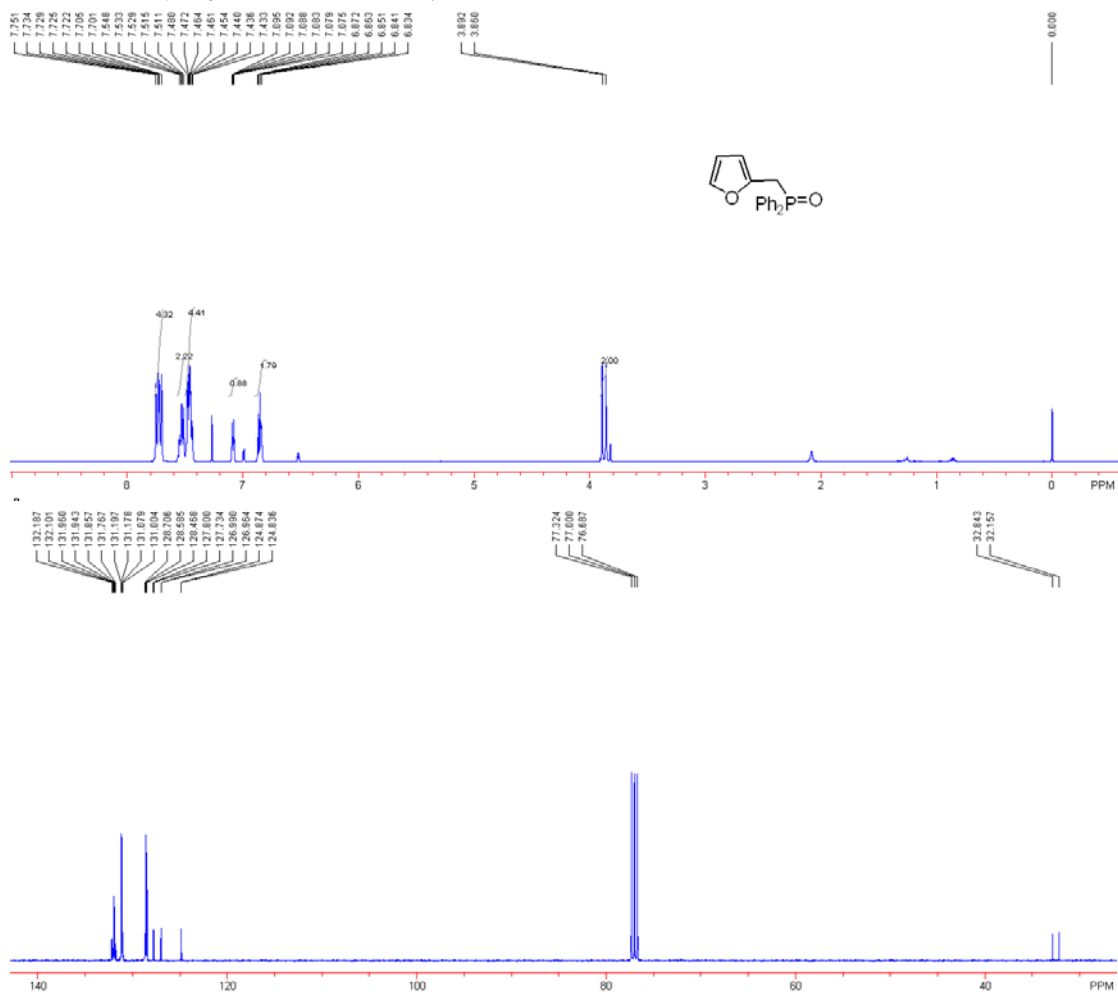

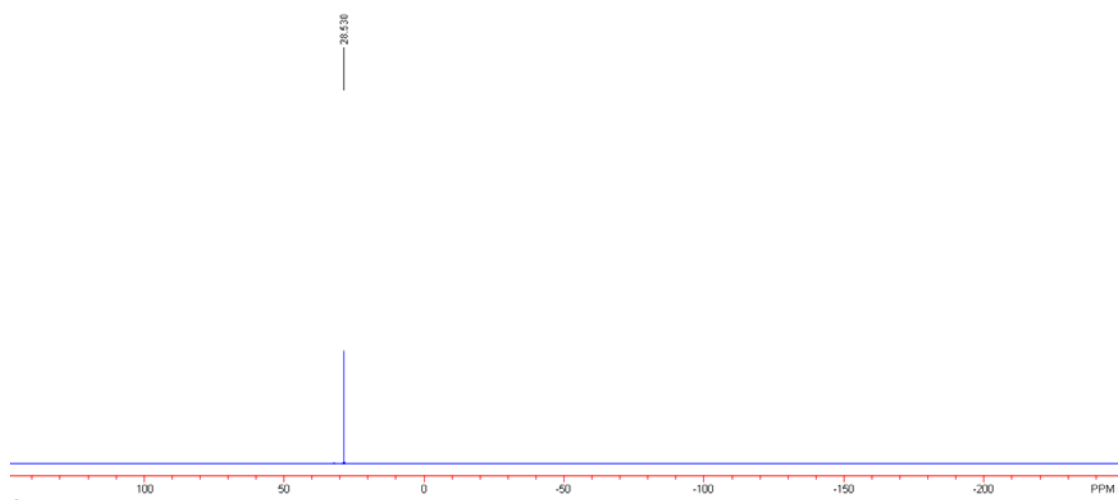

(Biphenyl-2-ylmethyl)diphenylphosphine oxide **3am**

White sticky solid,  $^1\text{H}$  NMR (400 MHz,  $\text{CDCl}_3$ , TMS)  $\delta$  3.72 (d,  $J = 14.0$  Hz, 2H), 6.96-6.98 (m, 2H), 7.12 (d,  $J = 7.2$  Hz, 1H), 7.26-7.37 (m, 9H), 7.41-7.49 (m, 6H), 7.58-7.61 (m, 1H).  $^{13}\text{C}$  NMR (100 MHz,  $\text{CDCl}_3$ , TMS)  $\delta$  33.8, 34.5, 126.80, 126.83, 126.9, 127.40, 127.43, 128.1, 128.3, 128.4, 128.7, 128.8, 129.5, 130.22, 130.23, 130.80, 130.84, 131.0, 131.1, 131.60, 131.62, 131.9, 132.8, 140.9, 142.5, 142.6.  $^{31}\text{P}$  NMR (160 MHz,  $\text{CDCl}_3$ , TMS)  $\delta$  29.9. MS (ESI)  $m/z$  (%): 391.1 (M + Na, 100); HRMS (Micromass LCT) Calcd for  $\text{C}_{23}\text{H}_{24}\text{OPNa}$ : 391.1228, Found: 391.1227.

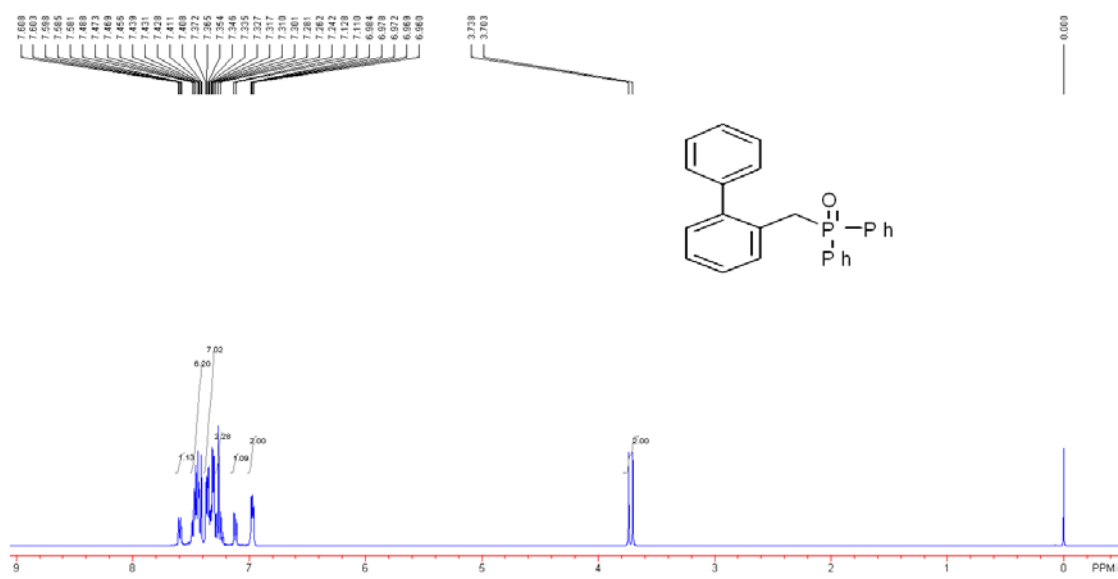

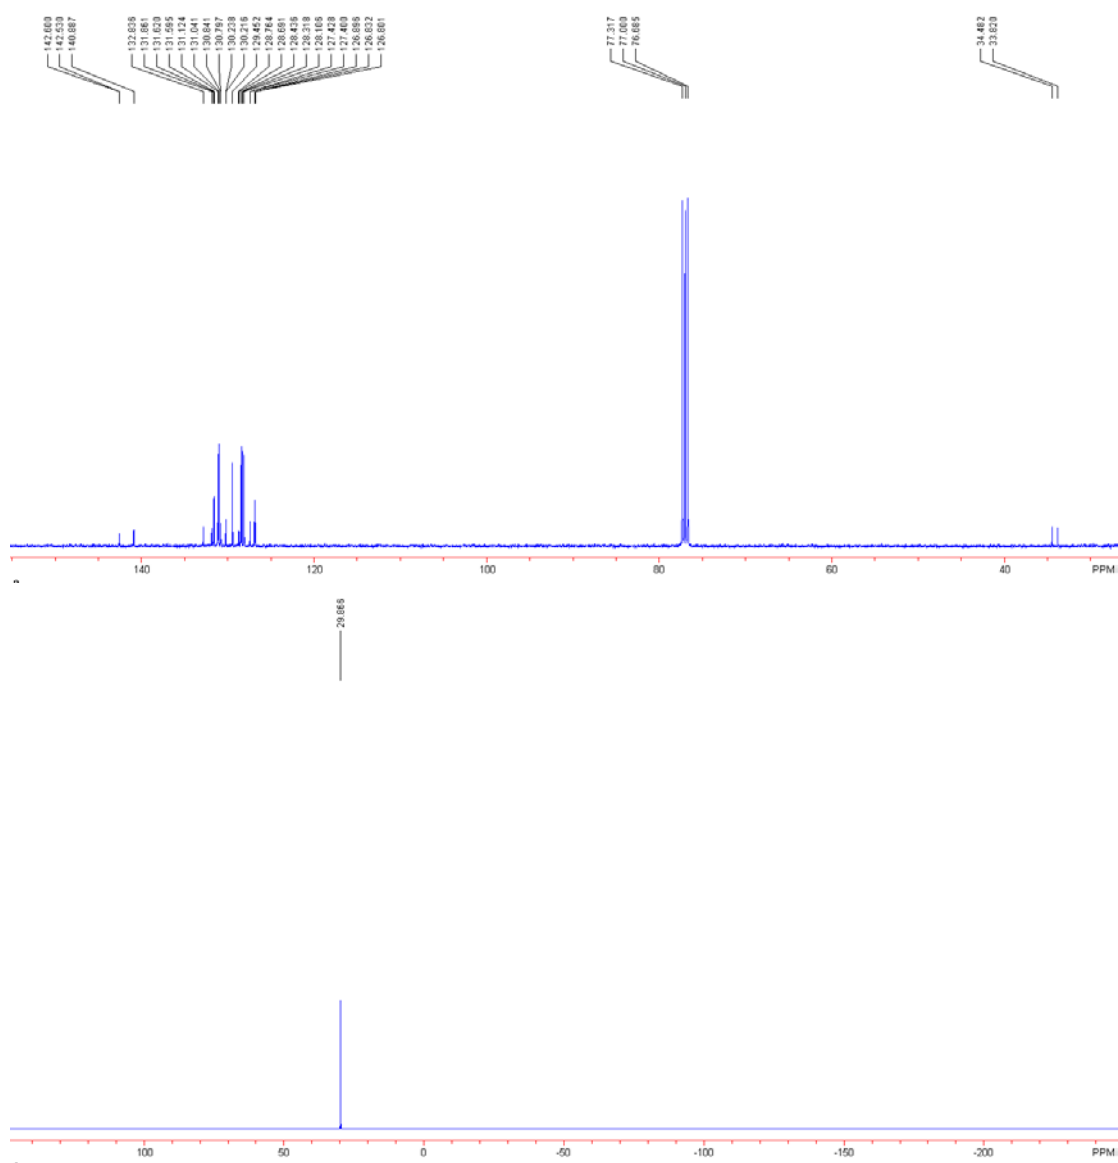

**((2'-Methoxybiphenyl-2-yl)methyl)diphenylphosphine oxide 3an**

White sticky solid,  $^1\text{H}$  NMR (400 MHz,  $\text{CDCl}_3$ , TMS)  $\delta$  3.49 (dd,  $J = 10.4, 14.8$  Hz, 1H), 3.64-3.72 (m, 4H), 6.51 (dd,  $J = 1.2, 7.2$  Hz, 1H), 6.84 (t,  $J = 7.6$  Hz, 1H), 6.91 (d,  $J = 8.4$  Hz, 1H), 7.06 (d,  $J = 6.8$  Hz, 1H), 7.23-7.28 (m, 6H), 7.36-7.40 (m, 3H), 7.45-7.56 (m, 3H), 7.68 (d,  $J = 7.6$  Hz, 1H).  $^{13}\text{C}$  NMR (100 MHz,  $\text{CDCl}_3$ , TMS)  $\delta$  34.1, 34.8, 55.4, 110.4, 120.6, 126.70, 126.72, 127.38, 127.40, 128.1, 128.2, 128.3, 128.4, 128.8, 129.50, 129.51, 130.18, 130.22, 130.25, 130.3, 130.41, 130.44, 130.94, 130.96, 131.03, 131.05, 131.29, 131.31, 131.53, 131.56, 131.57, 138.76, 138.83, 156.0.  $^{31}\text{P}$  NMR (160 MHz,  $\text{CDCl}_3$ , TMS)  $\delta$  30.40, 30.43, 30.50, 30.51, 30.53. MS (ESI)  $m/z$  (%): 335.2 (M + H, 100); HRMS (Micromass LCT) Calcd

for  $C_{23}H_{25}OP$ : 399.1514, Found: 399.1517.

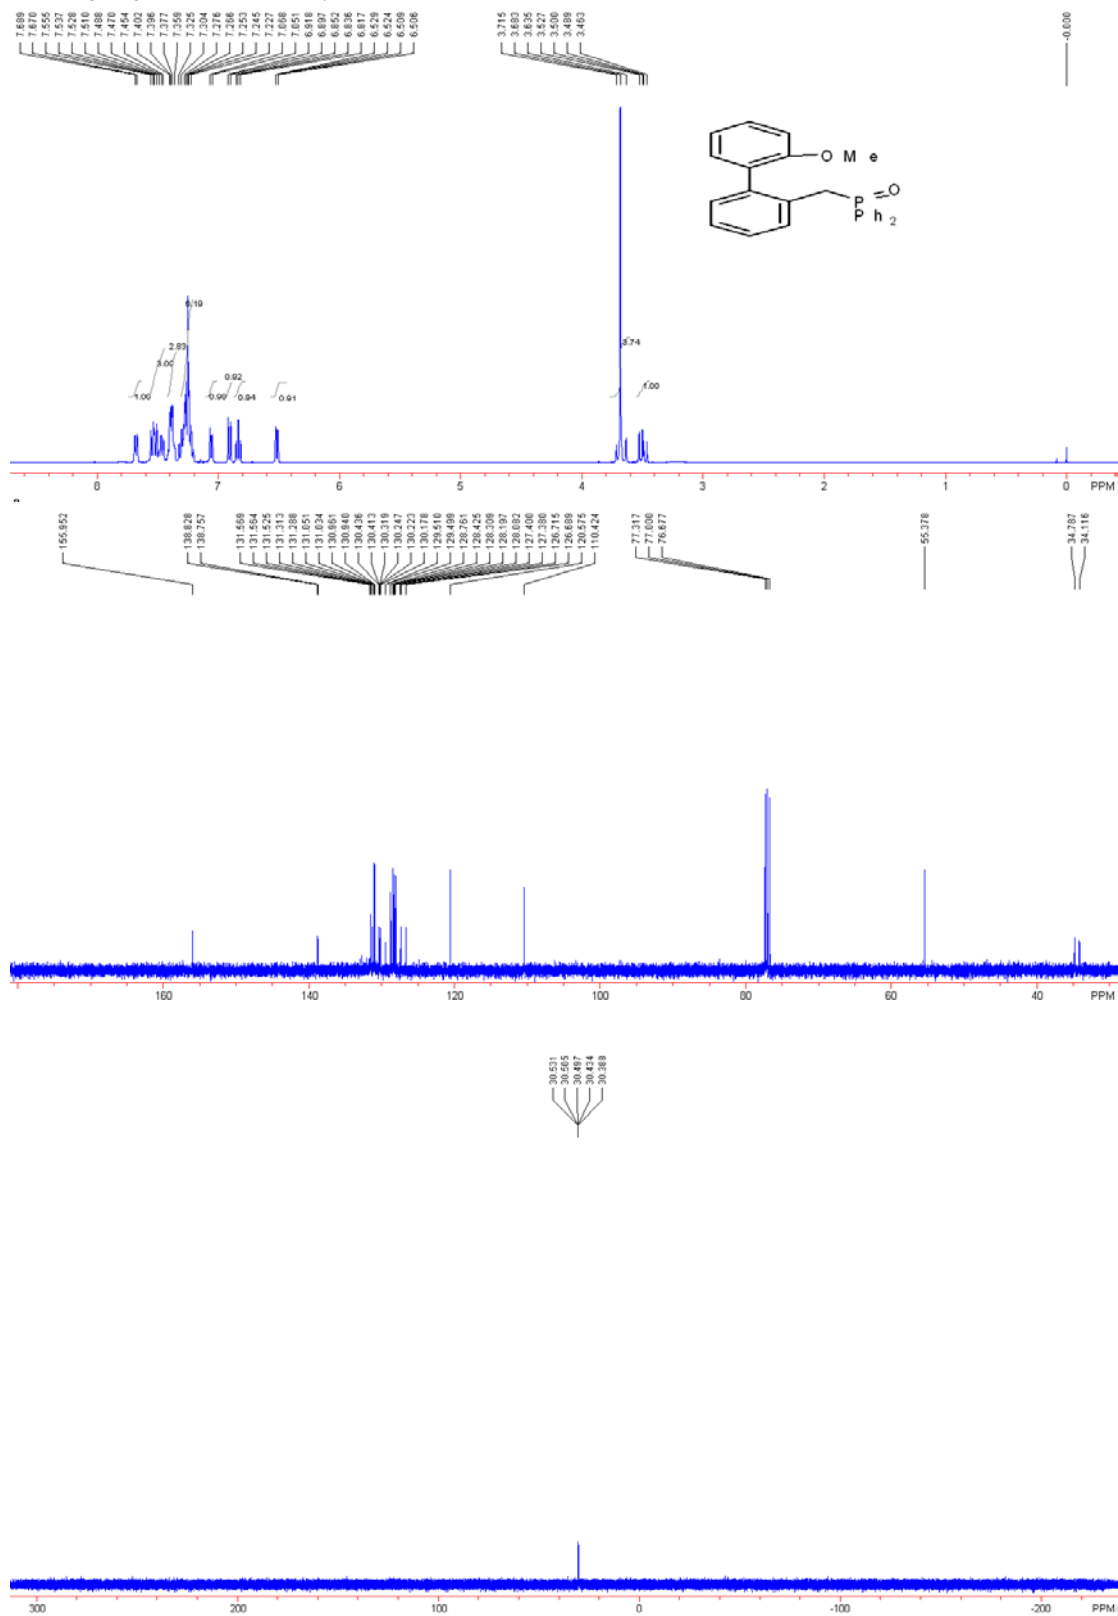

(Ferrocenylmethyl)diphenylphosphine oxide **3ao**

Yellow solid, Mp 201.5-202.1 °C.  $^1\text{H}$  NMR (400 MHz,  $\text{CDCl}_3$ , TMS)  $\delta$  3.43 (d,  $J = 16.8$  Hz, 2H), 4.01 (s, 4H), 4.09 (s, 5H), 7.41-7.53 (m, 6H), 7.64-7.70 (m, 4H).  $^{13}\text{C}$  NMR (100 MHz,  $\text{CDCl}_3$ , TMS)  $\delta$  32.7, 33.4, 67.8, 68.7, 69.56, 69.58, 128.2, 128.3, 130.9, 131.0, 131.5, 131.6, 132.5.  $^{31}\text{P}$  NMR (160 MHz,  $\text{CDCl}_3$ , TMS)  $\delta$  28.4. MS (ESI)  $m/z$  (%): 401.1 (M + H, 100); HRMS (Micromass LCT) Calcd for  $\text{C}_{23}\text{H}_{24}\text{OPFe}$ : 401.0758, Found: 401.0893.

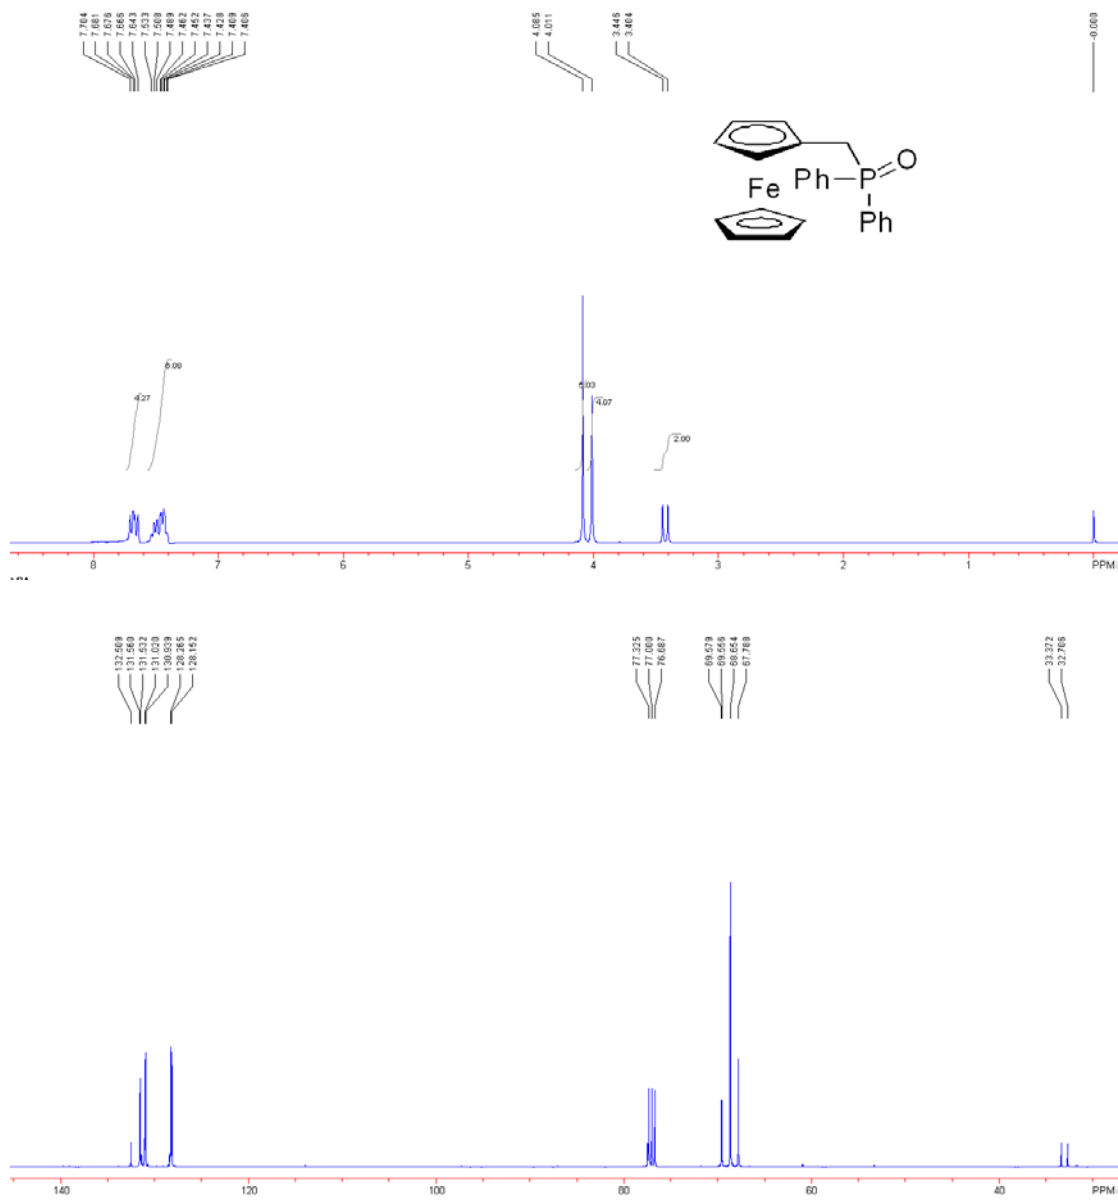

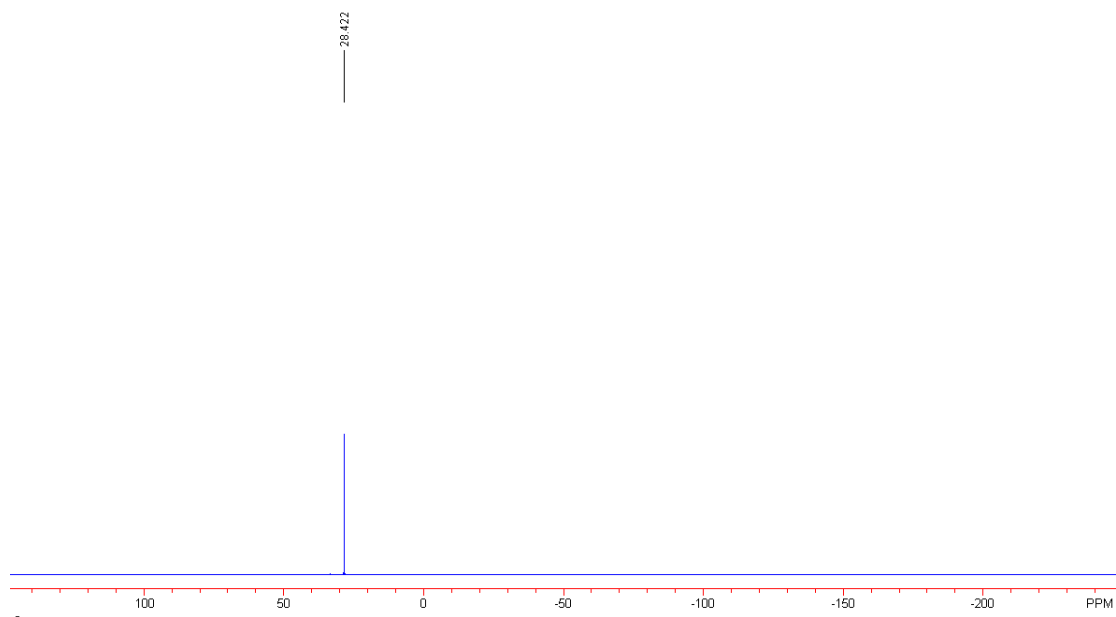

2-((Diphenylphosphino)methyl)phenol oxide **3ap** [5]

White solid, Mp 176.8-177.2 °C, <sup>1</sup>H NMR (400 MHz, CDCl<sub>3</sub>, TMS) δ 3.71 (d, *J* = 12.4 Hz, 2H), 6.69 (t, *J* = 7.2 Hz, 1H), 6.77 (t, *J* = 7.2 Hz, 1H), 7.00 (t, *J* = 7.6 Hz, 1H), 7.08-7.12 (m, 1H), 7.44-7.49 (m, 4H), 7.52-7.56 (m, 2H), 7.56-7.75 (m, 4H), 9.83 (s, 1H). <sup>13</sup>C NMR (100 MHz, CDCl<sub>3</sub>, TMS) δ 34.4, 35.1, 119.05, 119.07, 119.1, 120.36, 120.37, 128.6, 128.71, 128.75, 129.9, 130.8, 130.9, 131.51, 131.56, 132.27, 132.29, 156.32, 156.36. <sup>31</sup>P NMR (160 MHz, CDCl<sub>3</sub>, TMS) δ 38.3. MS (ESI) *m/z* (%): 309.1 (M + H, 100); HRMS (Micromass LCT) Calcd for C<sub>19</sub>H<sub>18</sub>O<sub>2</sub>P: 309.1044, Found: 309.1042.

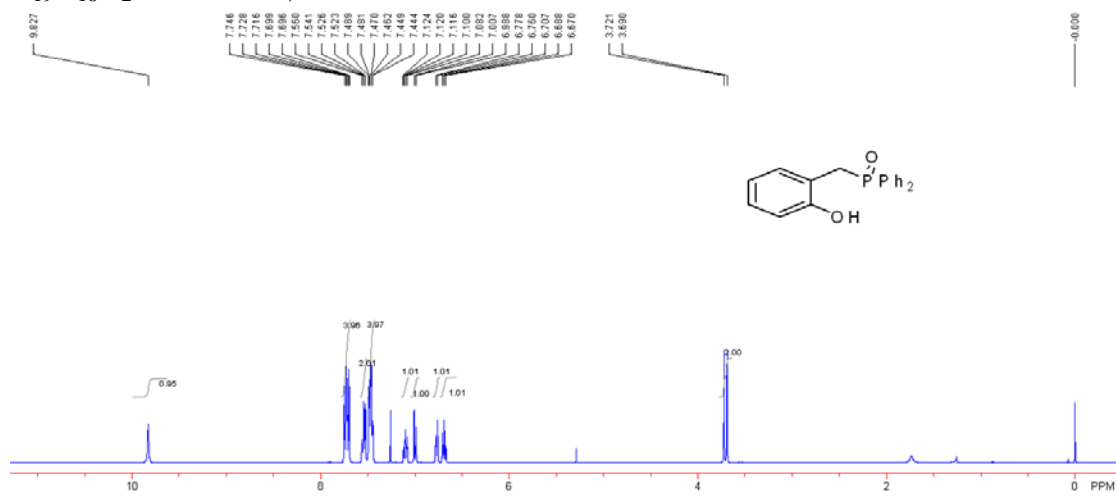



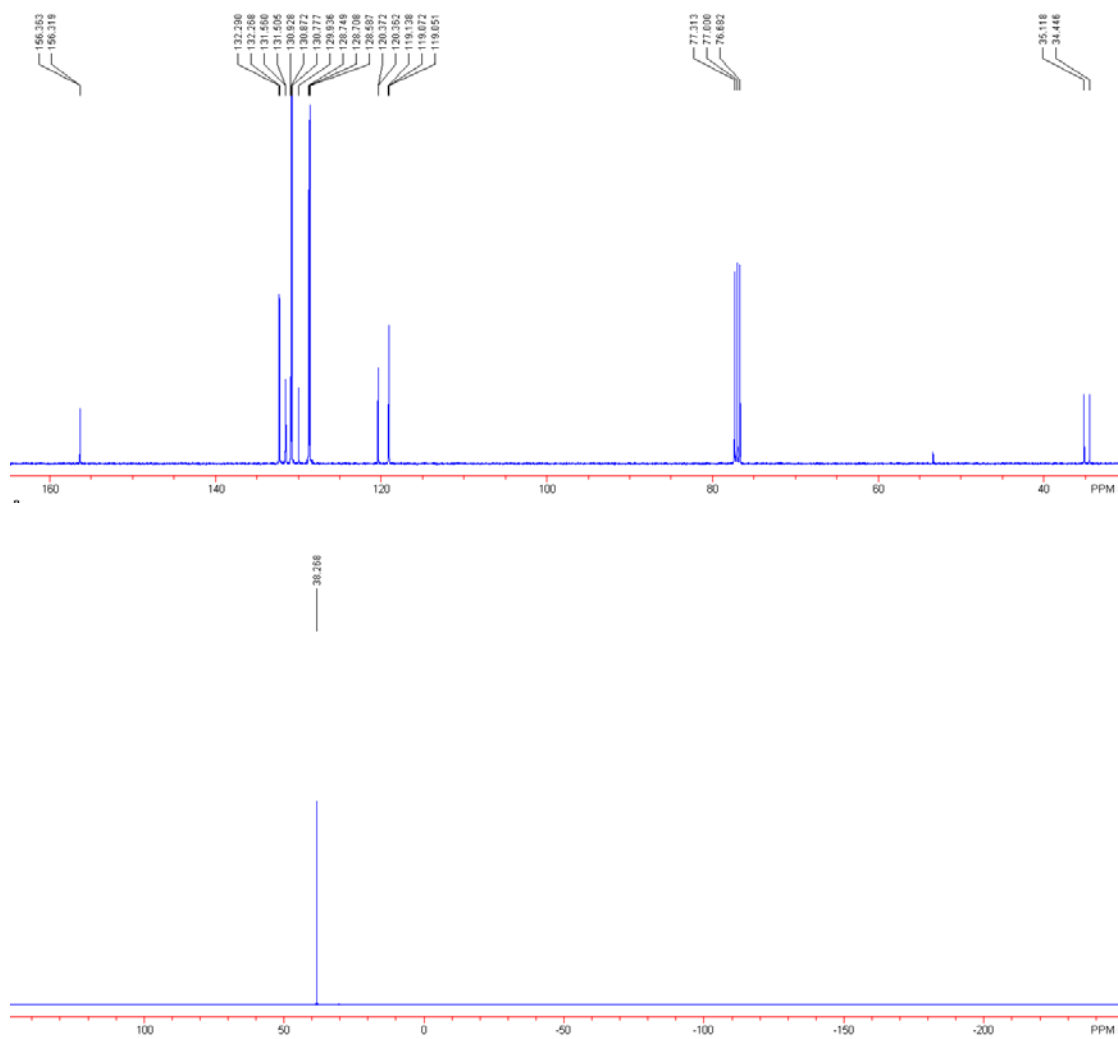

### Octyldiphenylphosphine oxide **3aq** <sup>[6]</sup>

Colorless liquid, <sup>1</sup>H NMR (400 MHz, CDCl<sub>3</sub>, TMS) δ 0.85 (t, *J* = 7.2 Hz, 3H), 1.23-1.28 (m, 8H), 1.36-1.43 (m, 2H), 1.57-1.67 (m, 2H), 2.23-2.29 (m, 2H), 7.44-7.52 (m, 6H), 7.72-7.77 (m, 4H). <sup>13</sup>C NMR (100 MHz, CDCl<sub>3</sub>, TMS) δ 13.9, 21.19, 21.23, 22.4, 28.80, 28.83, 29.2, 29.9, 30.7, 30.8, 31.6, 128.4, 128.5, 130.5, 130.6, 131.42, 131.45, 132.6, 133.5. <sup>31</sup>P NMR (160 MHz, CDCl<sub>3</sub>, TMS) δ 32.5. MS (ESI) *m/z* (%): 315.2 (M + H, 100); HRMS (Micromass LCT) Calcd for C<sub>20</sub>H<sub>28</sub>OP: 315.1878, Found: 315.1884

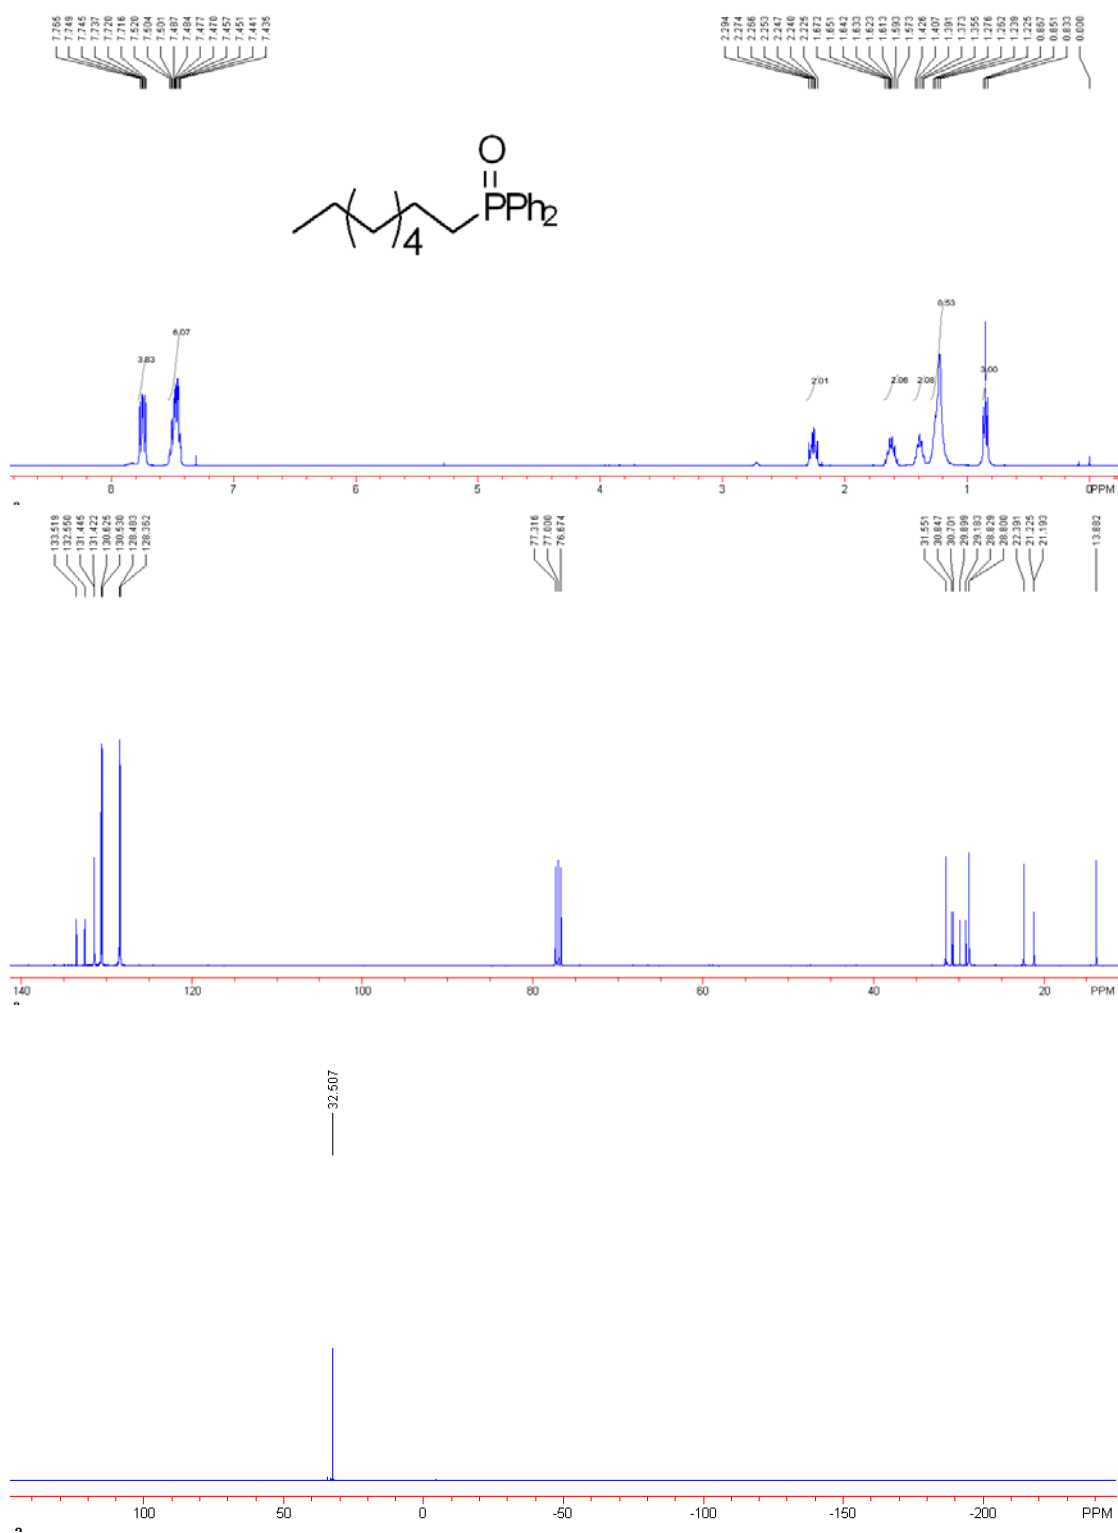

Benzyldiethylphosphine oxide **3ba** <sup>[5]</sup>

Colorless liquid,  $^1\text{H}$  NMR (400 MHz,  $\text{CDCl}_3$ , TMS)  $\delta$  1.15 (dt,  $J =$

10.0, 22.0 Hz, 6H), 1.59-1.73 (m, 4H), 3.12 (d,  $J = 14.8$  Hz, 2H), 7.24-7.34 (m, 5H).  
 $^{13}\text{C}$  NMR (100 MHz,  $\text{CDCl}_3$ , TMS)  $\delta$  5.08, 5.14, 18.6, 19.5, 34.3, 35.1, 126.2, 126.3, 128.2, 128.3, 128.86, 128.92, 131.7, 131.8.  $^{31}\text{P}$  NMR (160 MHz,  $\text{CDCl}_3$ , TMS)  $\delta$  49.2.  
MS (EI)  $m/z$  (%): 196.1 (M + H, 75), HRMS (Micromass LCT) Calcd for  $\text{C}_{11}\text{H}_{17}\text{OP}$ : 196.1017, Found: 196.1019.

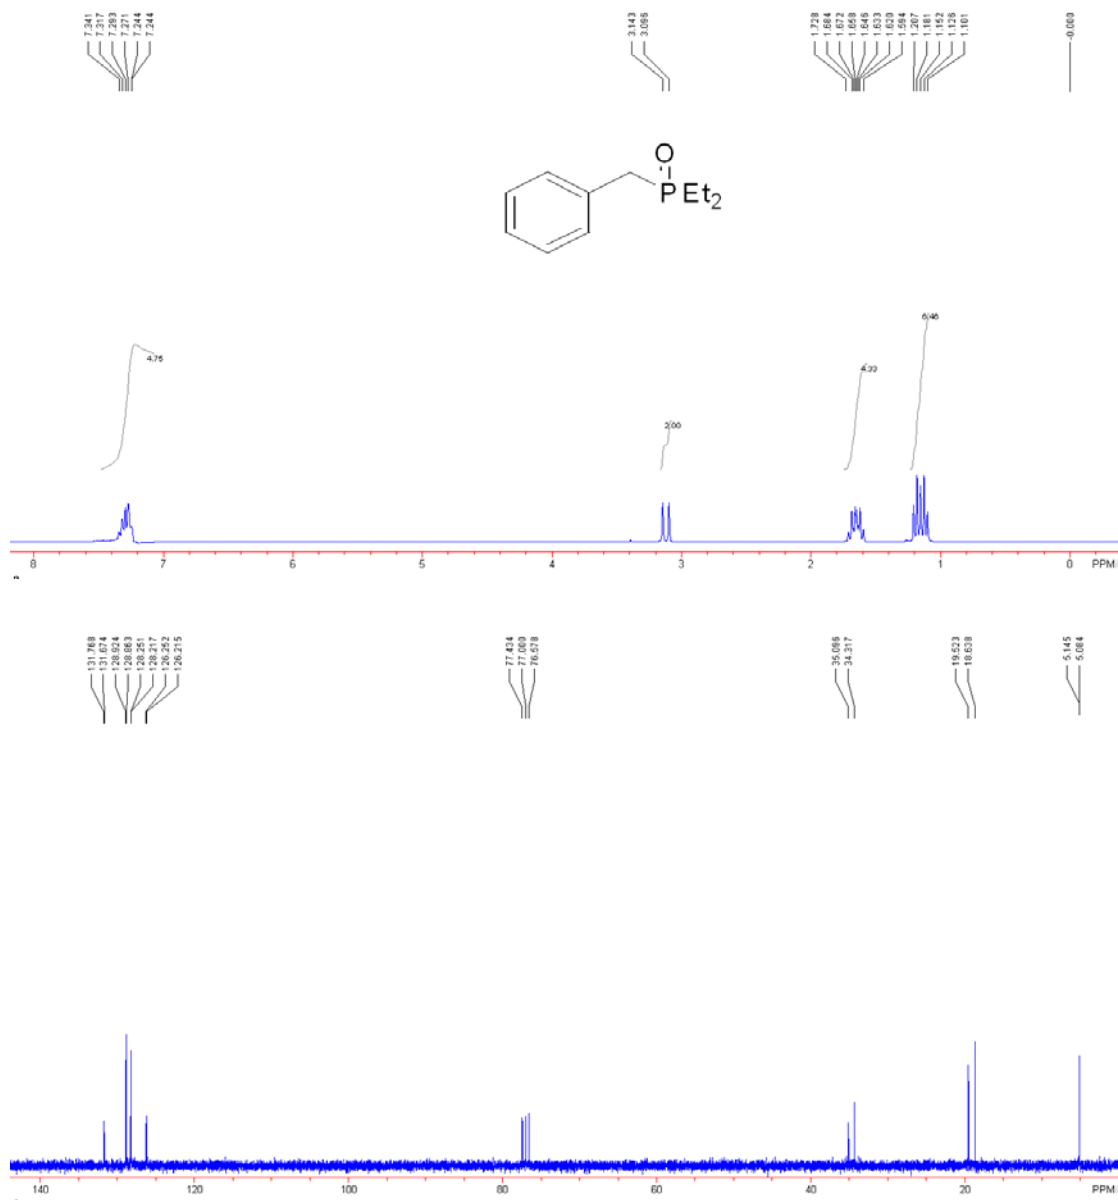

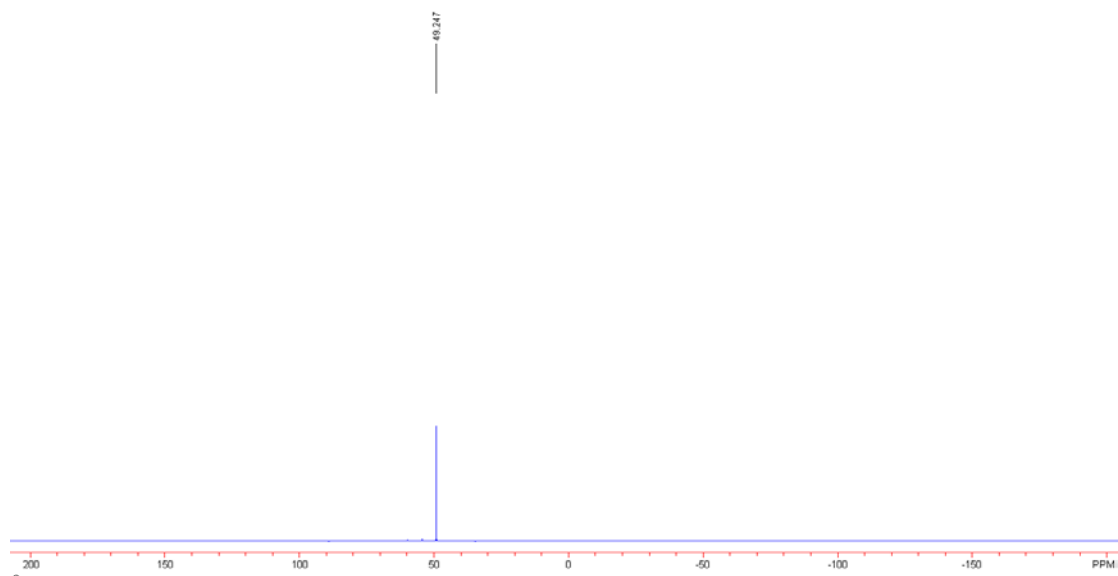

### Diethyl(octyl)phosphine oxide **3bq**

Colorless liquid,  $^1\text{H}$  NMR (400 MHz,  $\text{CDCl}_3$ , TMS)  $\delta$  0.88 (t,  $J = 6.8$  Hz, 3H), 1.17 (dt,  $J = 7.6, 15.6$  Hz, 6H), 1.27-1.30 (m, 8H), 1.37-1.42 (m, 2H), 1.53-1.62 (m, 2H), 1.65-1.76 (m, 6H).  $^{13}\text{C}$  NMR (100 MHz,  $\text{CDCl}_3$ , TMS)  $\delta$  5.24, 5.29, 13.5, 19.3, 19.9, 21.0, 21.1, 26.0, 26.7, 28.5, 28.6, 30.6, 30.7, 31.3.  $^{31}\text{P}$  NMR (160 MHz,  $\text{CDCl}_3$ , TMS)  $\delta$  51.4. MS (EI)  $m/z$  (%): 218.2 (M + H, 10), HRMS (Micromass LCT) Calcd for  $\text{C}_{12}\text{H}_{27}\text{OP}$ : 218.1800, Found: 218.1798.

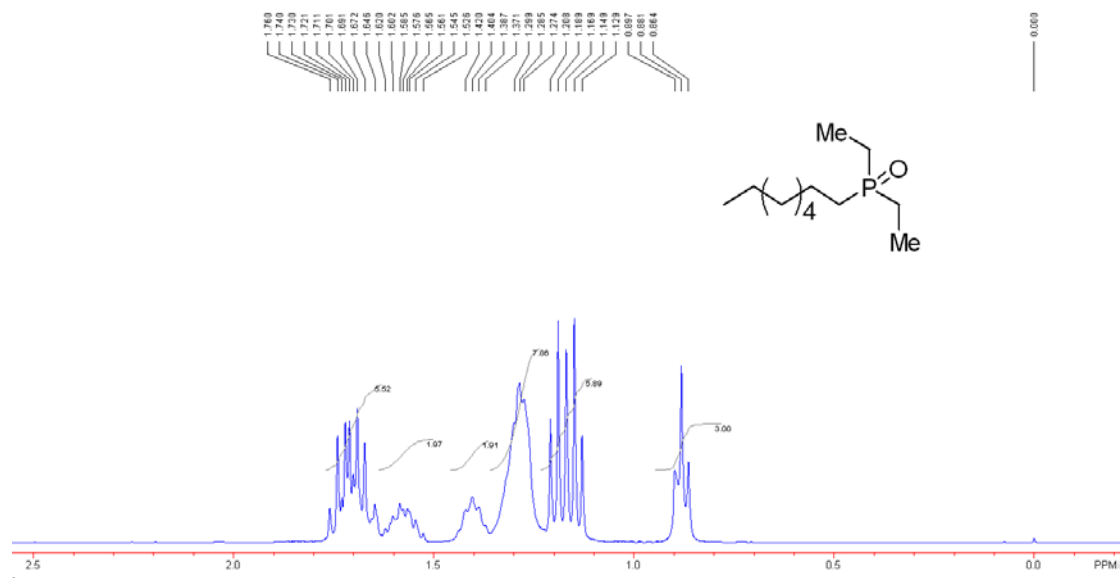

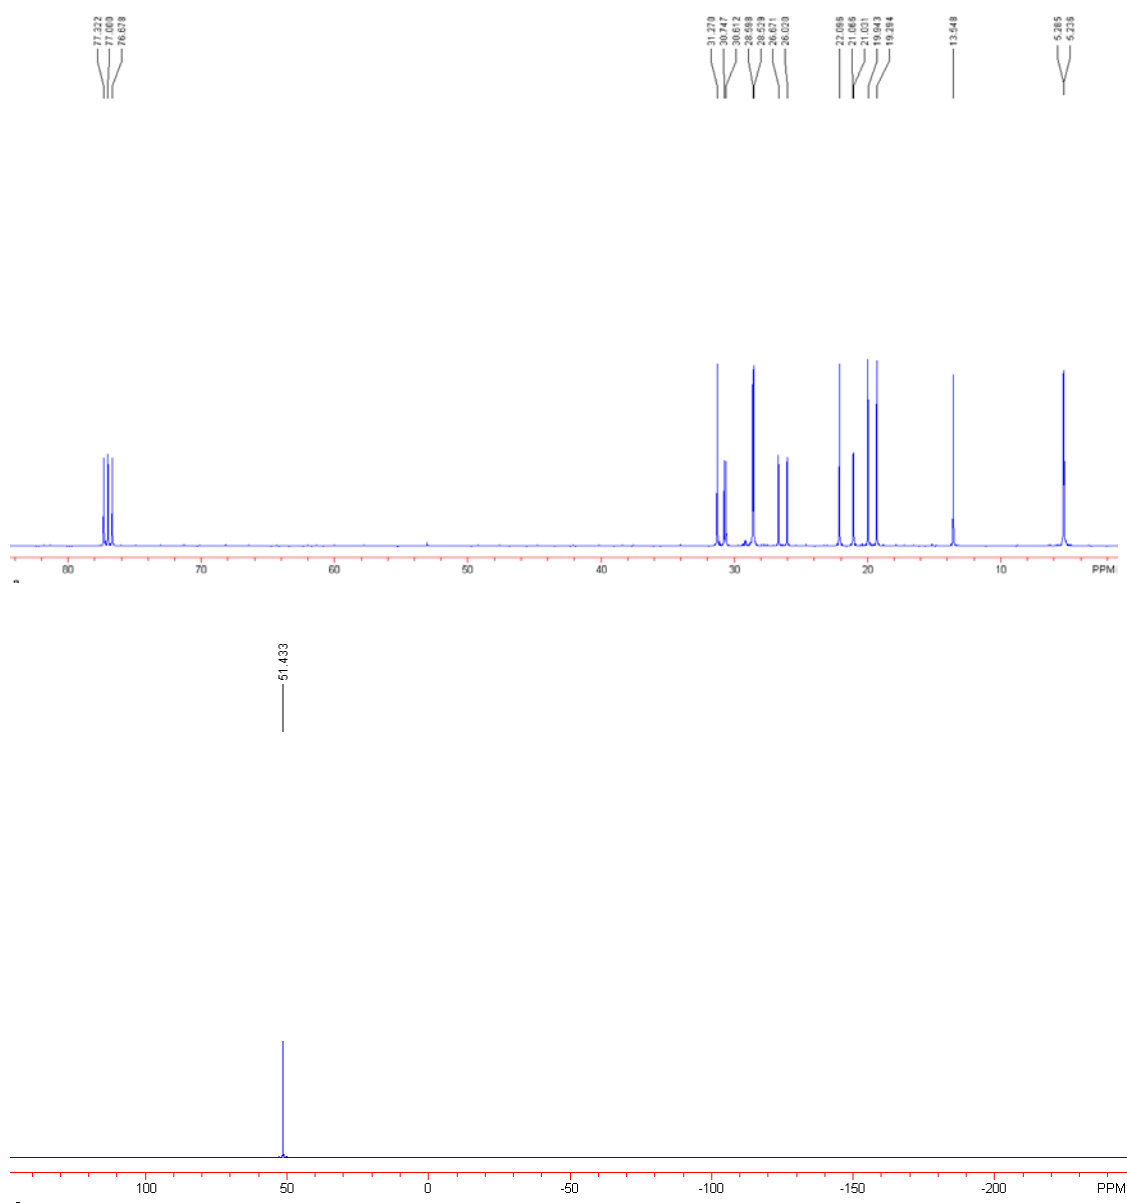

### Benzyldiphenylphosphine selenide **4b** <sup>[7]</sup>

Yellow solid Mp 174.1-174.8 °C <sup>1</sup>H NMR (400 MHz, CDCl<sub>3</sub>, TMS) δ 3.99 (d, *J* = 13.6 Hz, 2H), 6.97 (d, *J* = 7.2 Hz, 2H), 7.13-7.21 (m, 2H), 7.41-7.51 (m, 6H), 7.75-7.80 (m, 4H). <sup>13</sup>C NMR (100 MHz, CDCl<sub>3</sub>, TMS) δ 40.5, 41.0, 127.15, 127.19, 127.81, 127.84, 128.3, 128.5, 130.42, 130.47, 130.5, 130.66, 130.73, 131.2, 131.5, 131.6, 132.0, 132.1. <sup>31</sup>P NMR (160 MHz, CDCl<sub>3</sub>, TMS) δ 34.4. MS (EI) *m/z* (%): 356.0 (M + H, 60), HRMS (Micromass LCT) Calcd for C<sub>19</sub>H<sub>17</sub>PSe: 356.0233, Found: 356.0229.

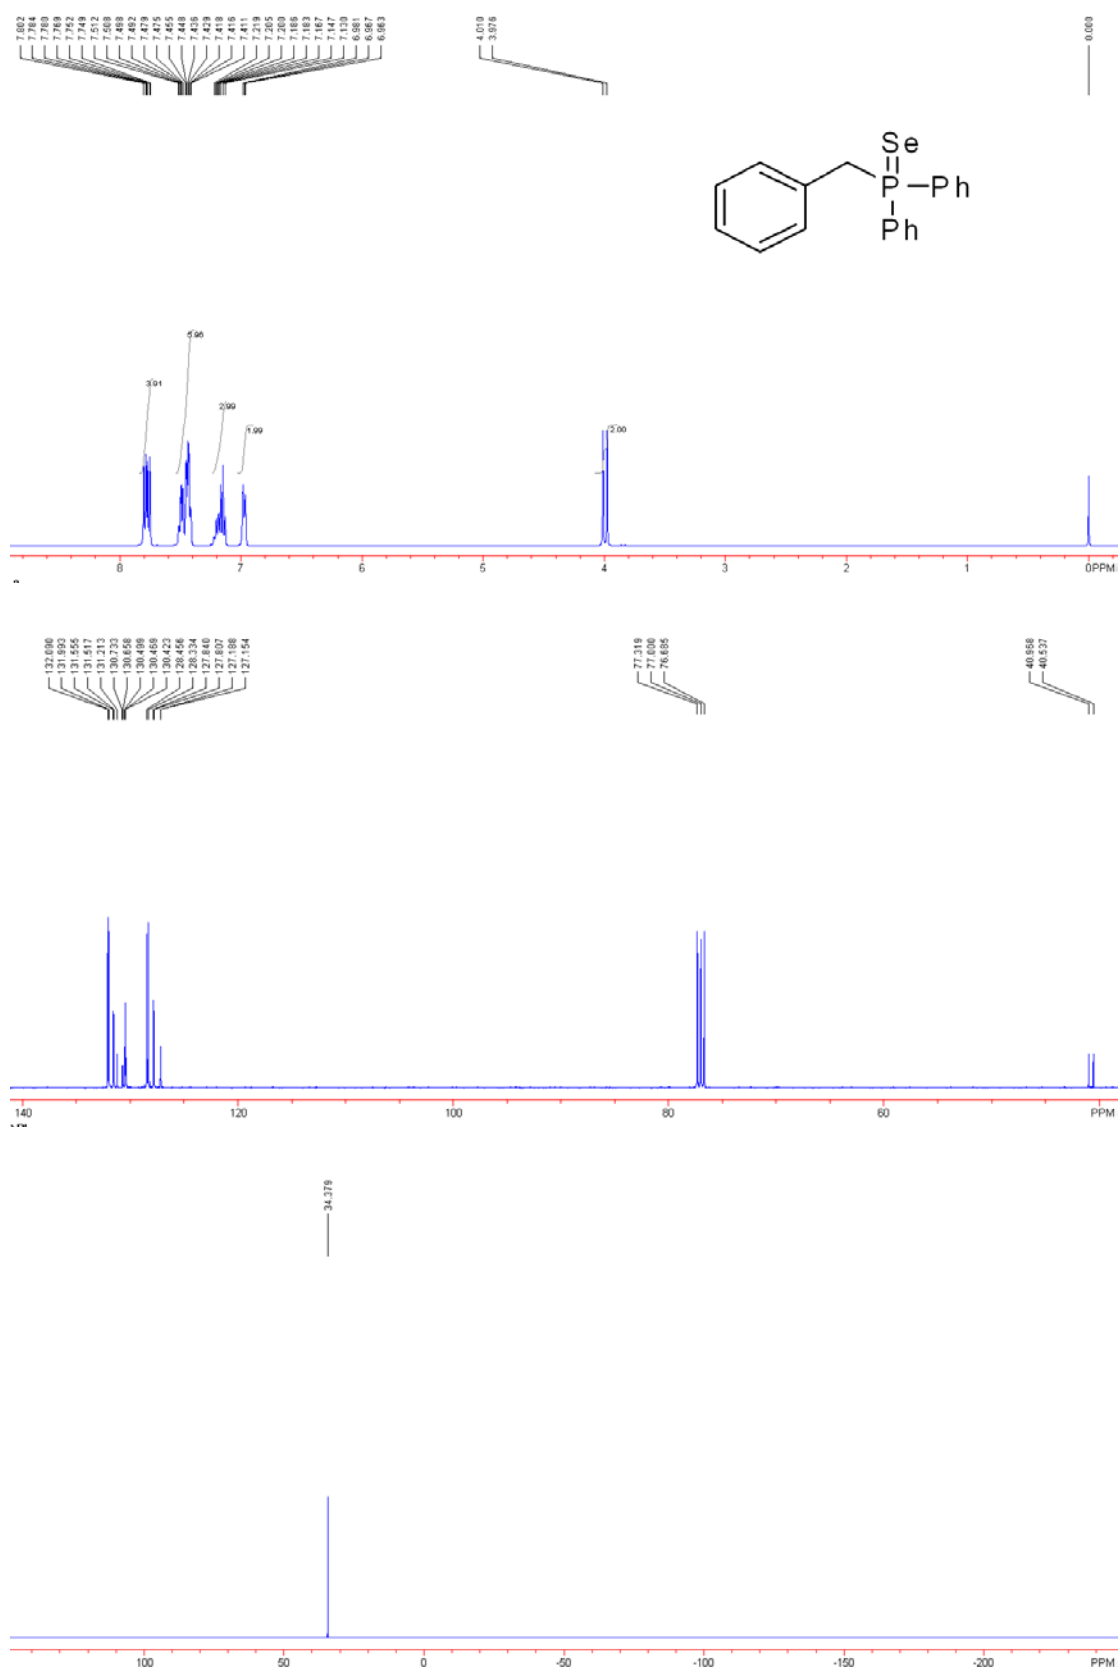

(1-(4-Methoxyphenyl)ethyl)diphenylphosphine oxide **6a** [8]

White solid, Mp 222.4-223.1 °C,  $^1\text{H}$  NMR (400 MHz,  $\text{CDCl}_3$ , TMS)  $\delta$  1.54 (dd,  $J = 10.0, 13.6$  Hz, 3H), 3.52-3.62 (m, 1H), 3.75 (s, 3H), 6.74 (d,  $J = 11.2$  Hz, 2H), 7.13 (dd,  $J = 2.4, 10.8$  Hz, 2H), 7.26-7.31 (m, 2H), 7.35-7.40 (m, 1H), 7.44-7.55 (m, 5H), 7.87-7.93 (m, 2H).  $^{13}\text{C}$  NMR (100 MHz,  $\text{CDCl}_3$ , TMS)  $\delta$  15.4, 15.5, 39.5, 40.2, 55.1, 113.60, 113.62, 127.9, 128.0, 128.5, 128.6, 129.5, 129.6, 130.06, 130.11, 131.0, 131.1, 131.22, 131.25, 131.3, 131.5, 131.60, 131.63, 132.3, 132.4, 158.42, 158.44.  $^{31}\text{P}$  NMR (160 MHz,  $\text{CDCl}_3$ , TMS)  $\delta$  33.8. MS (EI)  $m/z$  (%): 336.1 ( $M + H$ , 23), HRMS (Micromass LCT) Calcd for  $\text{C}_{21}\text{H}_{21}\text{O}_2\text{P}$ : 336.1279, Found: 336.1282.

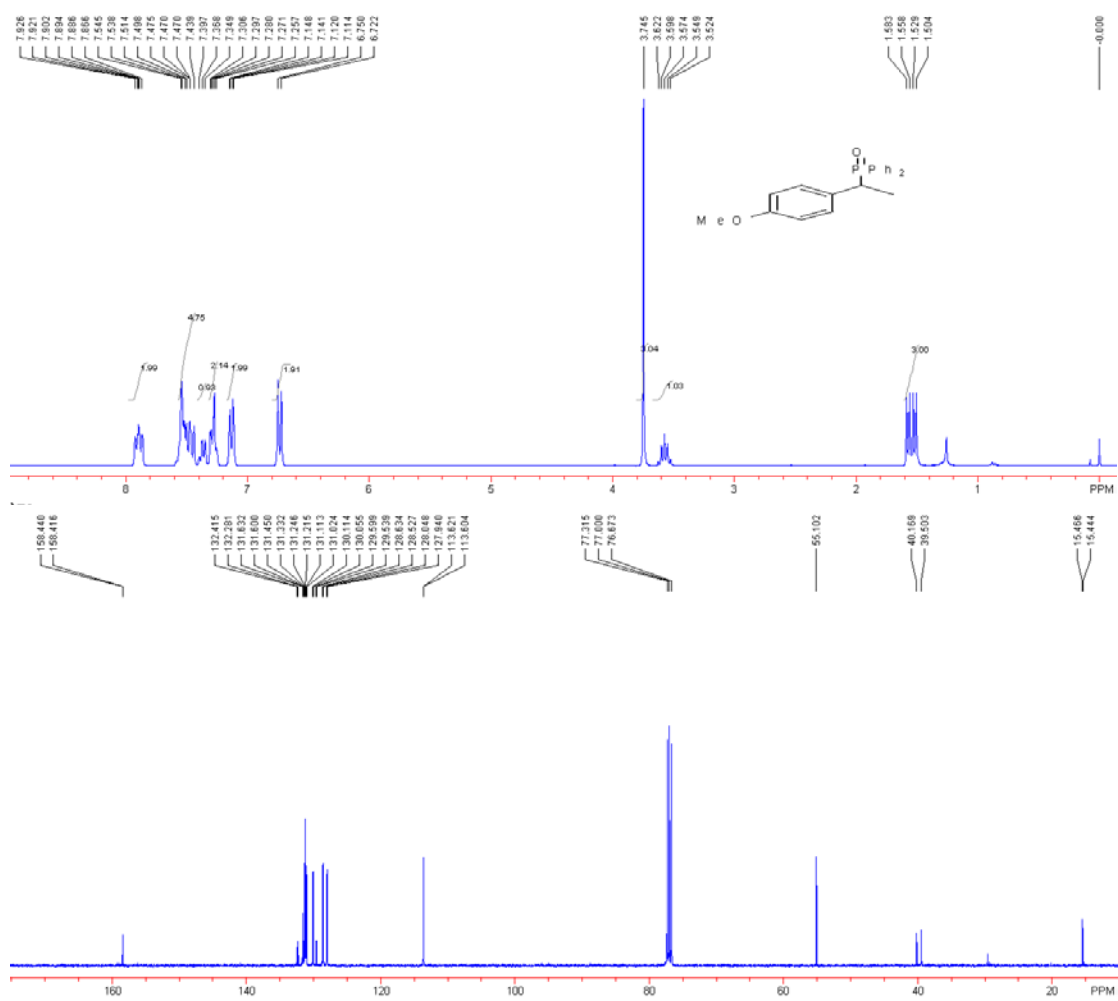

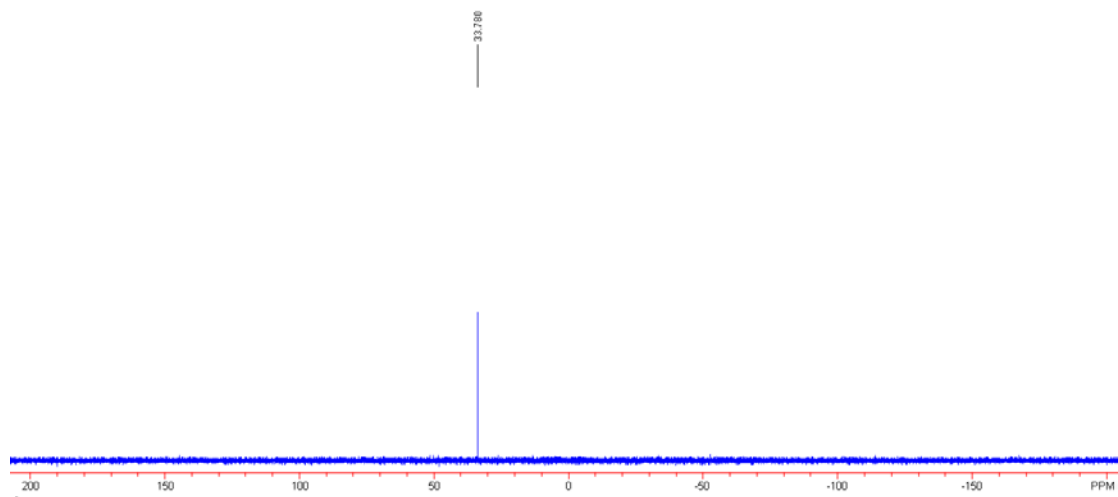

Diphenyl(1-phenylethyl)phosphine oxide **6b** [5]

White solid, Mp 150.1-150.9 °C. <sup>1</sup>H NMR (400 MHz, CDCl<sub>3</sub>, TMS) δ 1.58 (dd, *J* = 7.6, 16.4 Hz, 3H), 3.61 (q, *J* = 7.6 Hz, 1H), 7.16-7.27 (m, 7H), 7.33-7.37 (m, 1H), 7.43-7.47 (m, 2H), 7.50-7.58 (m, 3H), 7.88-7.92 (m, 2H). <sup>13</sup>C NMR (100 MHz, CDCl<sub>3</sub>, TMS) δ 15.25, 15.29, 40.4, 41.1, 126.7, 126.8, 127.8, 127.9, 128.09, 128.12, 128.5, 128.6, 129.0, 129.1, 130.9, 131.0, 131.14, 131.18, 131.24, 131.26, 131.3, 131.57, 131.60, 132.2, 132.3, 137.7, 137.8. <sup>31</sup>P NMR (160 MHz, CDCl<sub>3</sub>, TMS) δ 33.6. MS (ESI) *m/z* (%): 307.1 (M + H, 100); HRMS (Micromass LCT) Calcd for C<sub>20</sub>H<sub>20</sub>OP: 307.1252, Found: 307.1252.

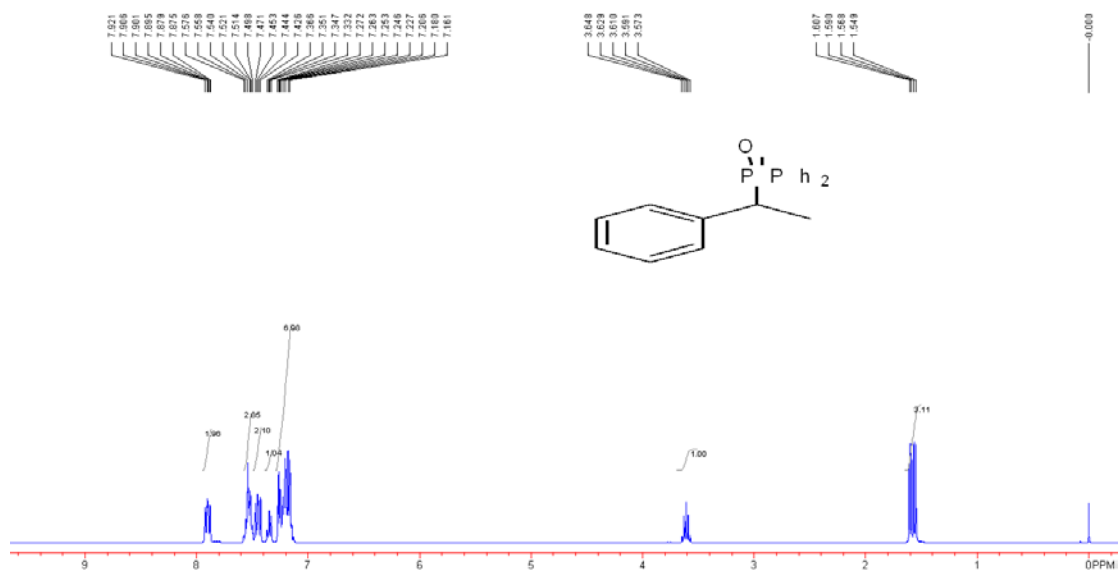



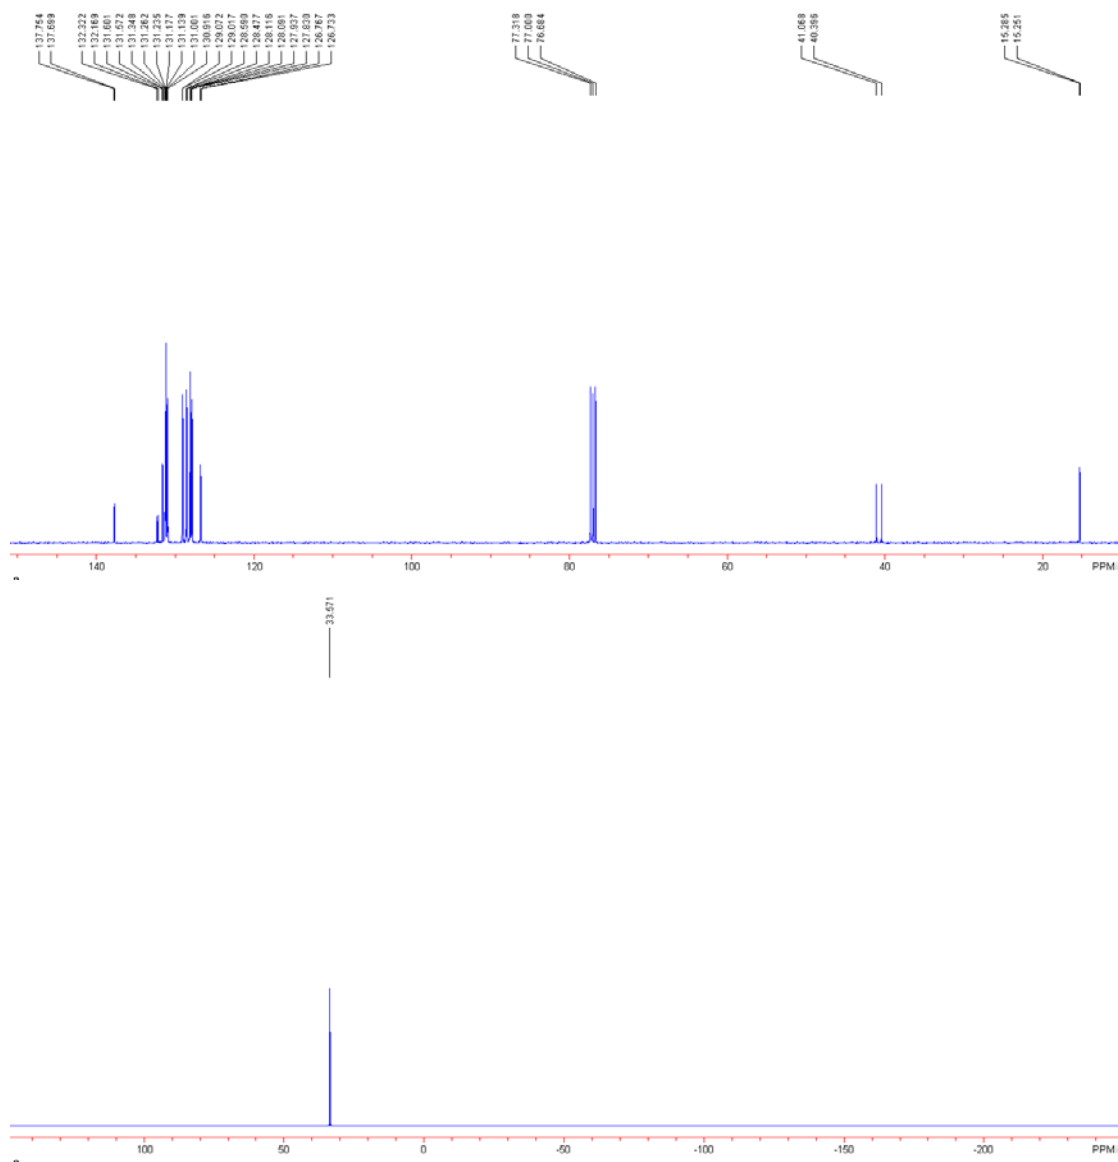

Dibenzylsulfane **8** <sup>[9]</sup>

Colorless liquid, <sup>1</sup>H NMR (400 MHz, CDCl<sub>3</sub>, TMS) δ 3.58 (s, 4H), 7.20-7.31 (m, 10H).

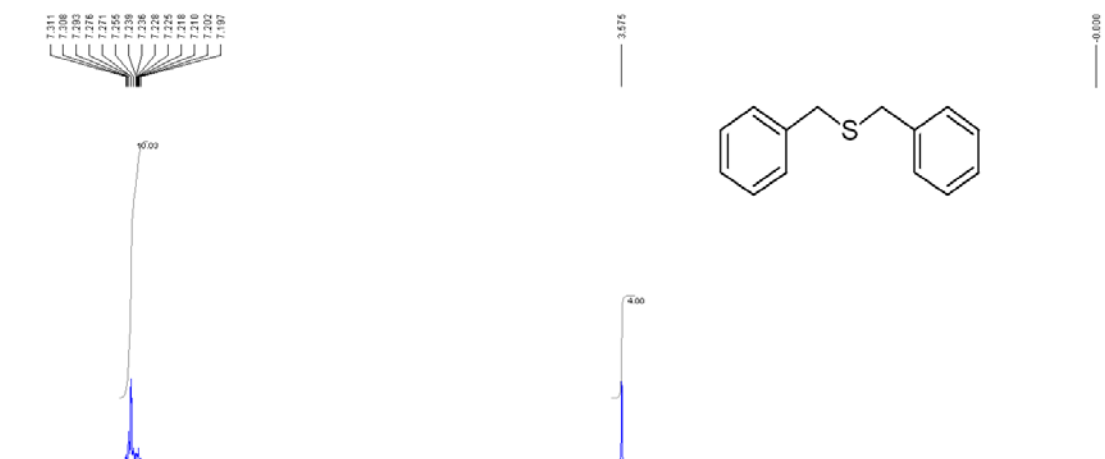

Mass spectra for the reaction of benzaldehyde with Ph<sub>2</sub>PI.

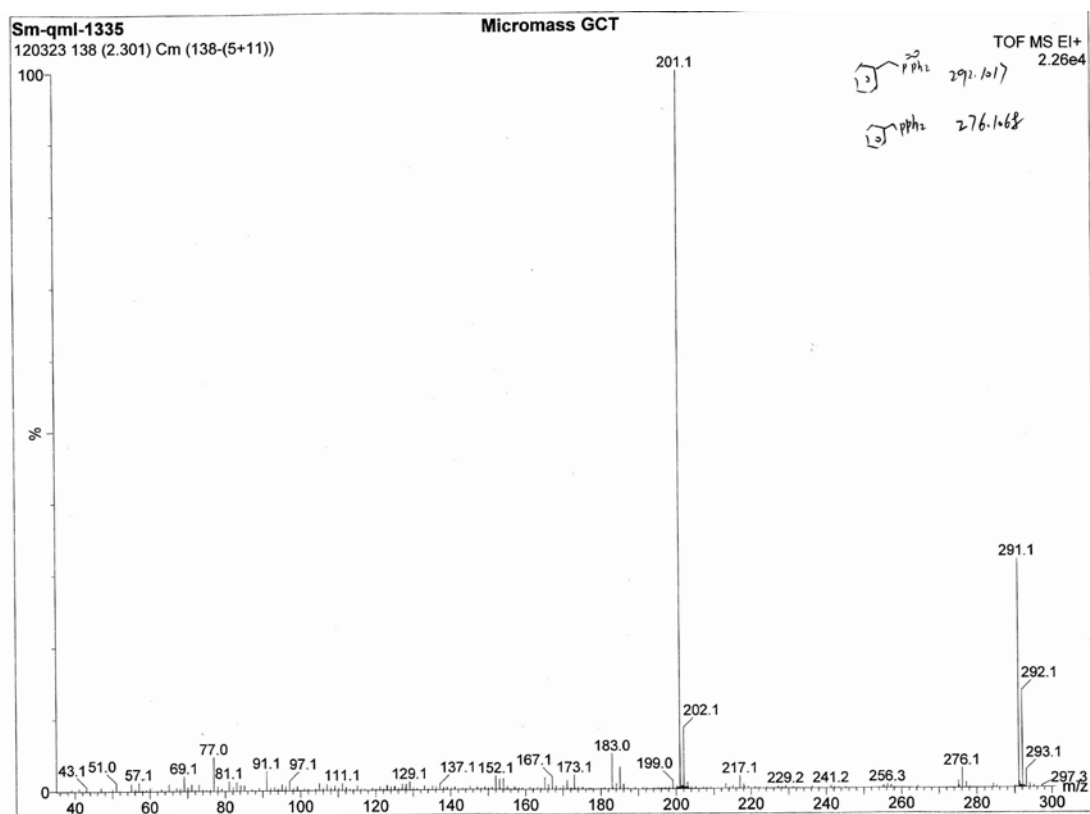

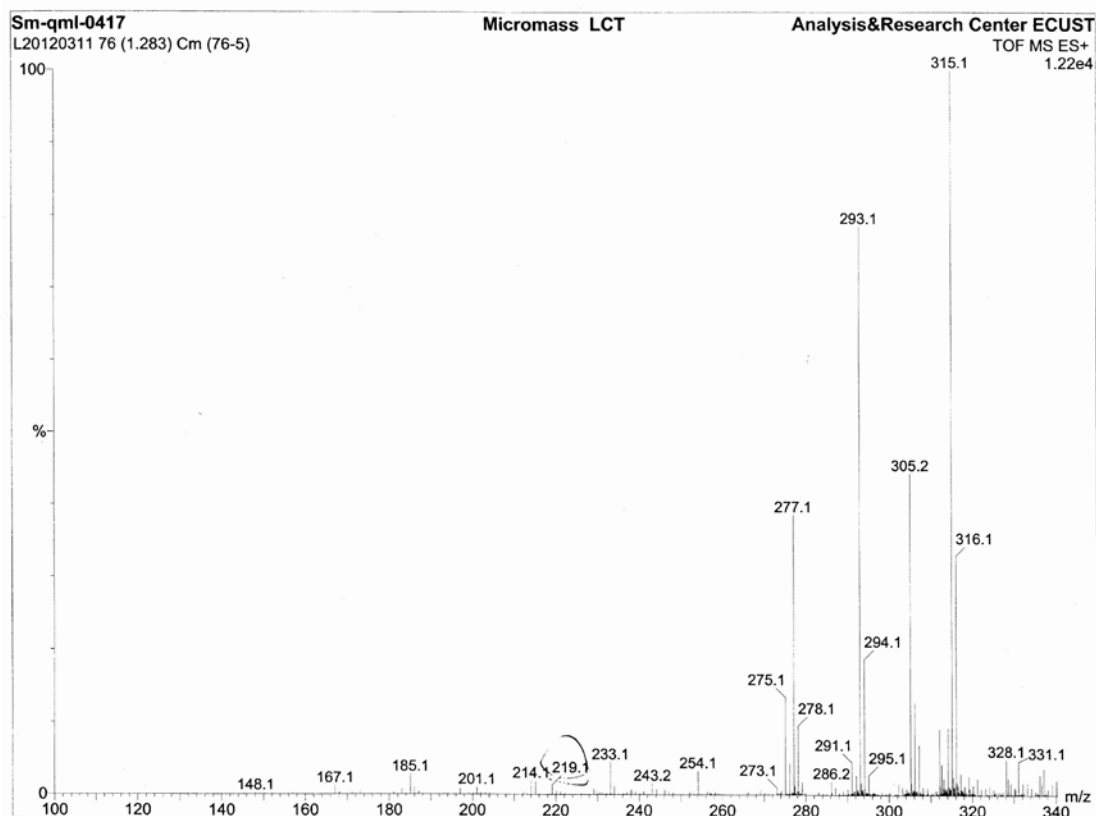

#### Reference

1. S. P. Bew, R. A. Brimage, D. L. Hughes, L. Legentil, S. V. Sharma, M. A. Wilson, *J. Org. Chem.* **2007**, *72*, 2655-2658.
2. Y. A. Drozdova, A. R. Burilov, M. A. Pudovik, A. N. Pudovik, *Zhurnal Obshchei Khimii.* **1992**, *62*, 1183-1184.
3. K. M. Brown, N. J. Lawrence, J. Liddle, F. J. Muhammad, *Tetrahedron Lett.* **1994**, *35*, 6733-6736.
4. W. Dabkowski, A. Ozarek, S. Olejniczak, M. Cypryk, J. Chojnowski, J. Michalski, *Chem. Eur. J.* **2009**, *15*, 1747-1756.
5. P. -Y. Renard, P. Vayron, C. Mioskowski, *Org. Lett.* **2003**, *5*, 1661-1664.
6. S. Kawaguchi, A. Nomoto, M. Sonoda, A. Ogawa, *Tetrahedron Lett.* **2009**, *50*, 624-626.
7. D. Cauzzi, C. Graiff, R. Pattacini, G. Predieri, A. Tiripicchio, S. Kahlal, J. -Y. Saillard, *Eur. J. Inorg. Chem.* **2004**, *5*, 1063-1072.
8. P. Cheruku, A. Paptchikhine, T. L. Church, P. G. Andersson, *J. Am. Chem. Soc.* **2009**, *131*, 8285-8289.
9. I. Cabrita, Sara C. A. Sousa, Ana. C. Fernandes, *Tetrahedron Lett.* **2010**, *51*, 6132-6135.
